# Supplementary material for: Serum Homocysteine Concentration Is Significantly Associated with Inflammatory/Immune Factors
Source: PLoS One. 2015 Sep 14;10(9):e0138099. doi: 10.1371/journal.pone.0138099 (PMC4569057; doi:10.1371/journal.pone.0138099)
Supplement: S5 Table — Drink A01: 1 drinking; 2 no drinking. Smoke B01: 1 smoke; 2 no smoke. BMI = weight / (height/100)2, WHR = waist/buttocks (XLS) [file pone.0138099.s005.xls]

## Sheet: Sheet1
ID	age	A01	B01	height	weight	BMI	waist	buttocks	WHR	HCY	IGG
H1183	40	1	1	164.3	55	20.3745	74.5	84	0.886905	12.72	12.61
H1203	56	2	1	166.2	58	20.9974	78	91	0.857143	17.31	13.54
H1204	34	1	1	167.1	62.5	22.3835	73.5	88.6	0.829571	13.42	13.84
H1207	27	1	2	166	49	17.782	67.5	79.3	0.851198	8.34	16.09
H1209	41	1	1	160	63	24.6094	83.4	88.5	0.942373	30.19	13.36
H1211	46	1	2	172	61	20.6193	74.3	90	0.825556	11.78	13.61
H1216	41	2	2	180	62.5	19.2901	71.5	91	0.785714	16.96	15.3
H1220	41	2	2	164	65	24.1672	83.2	90.5	0.919337	16.66	12.44
H1221	35	1	2	158.3	62	24.7417	85	93	0.913978	15.64	13.25
H1238	31	1	1	168.1	62	21.941	76.1	87.5	0.869714	12.24	13.52
H1244	46	1	2	165.1	75.5	27.6983	85.5	97	0.881443	10.34	14.67
H1169	37	1	1	166.7	52.5	18.8924	70	84	0.833333	12.72	15.62
H1171	45	1	1	161.7	58	22.1824	72	86.6	0.831409	17.55	11.53
H1172	49	1	1	164	55	20.4491	78	84.3	0.925267	13.63	12.92
H1173	43	2	2	165.5	54	19.715	80.4	90.5	0.888398	19.94	12.21
H1174	40	2	1	158.5	53.5	21.2959	67	82	0.817073	15.26	9.98
H1176	36	1	1	172.9	50	16.7255	67.5	82	0.823171	10.97	8.81
H1184	48	1	2	169.5	78.5	27.3231	73.7	99	0.744444	10.24	15.09
H1188	37	1	1	168	61	21.6128	77.5	91	0.851648	14.69	11.13
H1190	40	2	1	172.5	80.5	27.0531	91	100	0.91	15.01	9.87
H1191	30	1	1	171.5	80	27.1996	92	104	0.884615	13.49	10.08
H1194	26	1	2	170	72	24.9135	85.7	98	0.87449	11.53	9.65
H1200	35	1	1	167	66	23.6652	86	93.2	0.922747	12.69	11.73
H1202	51	1	2	164.5	72	26.6073	87.2	98.5	0.885279	13.74	13.25
H1208	47	1	1	170.6	62	21.3027	76.4	91.5	0.834973	17.55	15.11
H1210	45	1	1	178.6	76.5	23.9827	83	95.2	0.871849	20.98	14.12
H1219	26	1	2	168	67	23.7387	80.5	93.4	0.861884	16.79	15.4
H1227	46	1	1	159.5	60.5	23.7812	81.7	88.9	0.91901	14.86	14.18
H1234	52	1	1	166.1	62.5	22.6538	77.8	89.7	0.867336	12.17	14.14
H1236	35	1	2	165.7	54	19.6675	71	84.5	0.840237	16.43	16.08
H1242	23	1	1	175	76.5	24.9796	82.7	99	0.835354	11.07	11.02
R370	49	2	1	170.5	80	27.5195	97	99	0.979798	15.47	11.01
R374	30	1	2	173	81	27.0641	90.5	100.7	0.898709	12.45	13.4
R375	40	1	2	169	94	32.912	97.5	103.5	0.942029	16.07	10.9
H1186	52	1	2	158.6	78.5	31.2078	98	99.5	0.984925	17.21	11.67
H1175	37	1	2	174.7	73.5	24.0825	89	95	0.936842	16.03	10.61
H1182	36	1	1	173.4	82.5	27.4382	99.5	104	0.956731	11.97	9.2
H1185	31	1	1	165	78	28.6501	89.7	101	0.888119	16.08	10.62
H1195	42	1	2	176.1	69.5	22.4113	80.5	92	0.875	14.1	9.13
H1198	43	1	2	174	79	26.0933	86.5	98.7	0.876393	17.21	8.92
R372	25	1	2	177.5	82	26.0266	87	97	0.896907	14.87	9.18
H1168	21	1	2	167.3	69.5	24.8309	83	85	0.976471	15.67	14.29
H1199	43	1	2	157.6	52.5	21.1372	73.1	88	0.830682	14.49	10.54
H1167	48	2	1	173.1	65	21.693	78.5	90.7	0.865491	13.61	9.34
H313	43	1	1	167	63	22.5896	82.1	89.5	0.917318	12.29	11.65
H670	46	1	2	161.9	59.5	22.6999	72	89.3	0.806271	20.26	13.91
H538	38	1	1	170	79	27.3356	93.5	99.5	0.939698	15	11.47
H539	34	1	1	165.2	55.5	20.3363	81	87.4	0.926773	14.83	12.46
H540	46	1	1	167.8	66	23.4401	85.5	92	0.929348	17.55	14.48
H472	39	1	1	172.5	71.5	24.0286	85.6	95.6	0.895397	11.4	14.22
H548	34	1	1	165.2	74	27.1151	93	94	0.989362	19.17	12.61
H550	40	1	2	165.2	69	25.283	89	96	0.927083	16.73	12.24
H547	39	1	2	163.5	61	22.8189	82	88.5	0.926554	20.93	14.57
H730	40	1	1	176.5	73	23.4333	81.3	94.5	0.860317	16.98	13.91
H736	57	1	2	160.5	68.5	26.5914	90	96.5	0.932642	19.32	13.66
H738	52	1	1	172	75	25.3515	87.5	93	0.94086	18.74	11.61
H756	28	1	2	166	50.5	18.3263	66	83.5	0.790419	13.86	12.04
H767	55	2	1	174.2	64	21.0903	81.5	92	0.88587	11.96	9.53
H773	28	1	2	163.9	57.5	21.4047	69.5	87	0.798851	16.69	9.25
H779	29	1	2	172.2	65	21.9203	75.5	93.5	0.807487	15.65	14.76
H815	36	1	2	168.1	64	22.6488	79.6	90.5	0.879558	15.72	11.21
R264	45	2	1	160.3	66.5	25.8794	87.7	94	0.932979	13.15	11.78
R273	60	2	2	163.6	65	24.2855	86	94	0.914894	15.94	16.05
H776	44	1	2	164.3	62.5	23.1529	81.5	92	0.88587	15.52	15.99
H777	45	1	2	170.8	72.5	24.8521	83.5	93	0.897849	17.55	10.91
H782	44	1	2	176.8	70.5	22.5541	84.2	93	0.905376	16.87	11.23
H783	61	1	1	162.3	63	23.9168	86	90.5	0.950276	21.66	12.18
H802	60	1	1	168.5	68	23.9502	90.5	91.2	0.992325	27.41	11.75
H804	31	1	2	167	65	23.3067	73	93	0.784946	26.23	14.82
H806	31	1	2	164.5	62	22.9118	79.5	91	0.873626	13.49	14.84
H813	30	1	2	165.3	68.5	25.0695	82.5	94.5	0.873016	12.98	11.26
H817	39	1	1	175.5	66	21.4284	78.5	82	0.957317	18.26	12.58
H739	55	1	2	172.7	75	25.1464	92	96.5	0.953368	13.62	11.37
R373	26	1	2	163.7	51	19.0315	66	83.5	0.790419	14.25	14.04
H1217	59	1	1	172.5	69	23.1884	83	92.5	0.897297	21.19	10.89
H743	24	1	2	172	62	20.9573	69.5	87.6	0.793379	16.89	12.34
H365	64	2	1	170.2	63.5	21.9207	78.5	91	0.862637	12.56	10.98
H287	40	1	1	165.5	67.5	24.6438	87	94	0.925532	20.22	12.5
H156	34	2	1	174.5	76	24.9587	89.1	96.9	0.919505	15.14	11.9
H2146	36	1	2	170.4	56.5	19.4585	76	87.6	0.86758	15.29	14.26
H2156	35	1	2	172.5	65.5	22.0122	82.6	91	0.907692	12.08	8.95
H2253	26	1	2	169	56.5	19.7822	74	86.7	0.853518	15.1	15.95
H2258	37	1	2	157.5	68	27.4124	91.4	89	1.02697	9.84	9.77
H2262	49	2	2	157.5	70	28.2187	93.5	94.5	0.989418	15.96	13.19
H2268	30	1	2	165.5	55	20.0801	75.2	83.8	0.897375	11.28	9.68
H2273	43	1	2	167.5	76.5	27.2667	93.1	95.5	0.974869	10.44	12.48
H2274	44	2	1	172	76.5	25.8586	85.3	94	0.907447	16.56	8.82
H2283	43	2	1	167.5	73.5	26.1974	95	96.2	0.987526	16.83	9.75
H2284	44	2	2	178.4	66	20.7374	79.3	89.4	0.887025	15.1	11.02
H1122	40	1	2	166.2	76	27.5139	89	97.5	0.912821	267.64	11.27
H1133	38	1	2	176.5	80	25.6803	88.1	97	0.908247	14.76	16.03
H503	26	1	1	169.2	57.5	20.0848	77.6	90	0.862222	11.56	13.57
H531	35	1	1	165.6	60	21.8792	80.3	90	0.892222	11.62	11.04
H532	35	2	1	162.1	61	23.2147	79.5	90	0.883333	13.83	10.41
H1163	24	1	2	169	59.5	20.8326	73	91	0.802198	16.56	9.51
H1164	25	1	1	169.2	69.5	24.2764	89	95	0.936842	13.86	11.01
H1312	44	2	2	165.1	65	23.8462	85.2	91.5	0.931148	9.9	10.77
H382	22	2	1	170	56	19.3772	70	87.5	0.8	10.85	13.44
H415	26	1	1	167.1	54	19.3393	68.5	87	0.787356	14.66	11.85
H553	41	1	1	162.6	71.5	27.0436	90.8	98.2	0.924644	15.23	8.25
H554	34	1	1	170	54.5	18.8581	76.2	86	0.886047	13	16.3
H1298	41	1	1	167.2	69	24.6818	86.7	97	0.893814	14.22	12.32
H1289	40	1	2	166.5	68	24.529	79.4	94.5	0.840212	12.31	13.11
H1290	43	1	2	161	78.5	30.2843	97.5	100.5	0.970149	12.57	14.57
H1291	53	2	2	176.1	70	22.5725	84	94.5	0.888889	11.85	15.17
H1299	36	1	1	173.5	88.5	29.3998	94.5	102.6	0.921053	14.22	12.47
H1088	41	1	2	174.6	75	24.6021	85.1	97	0.87732	11.88	11.01
H850	24	1	2	165	56	20.5693	64.5	85.7	0.752625	12.97	13.95
H1086	24	1	2	159.1	66	26.0738	85.8	94	0.912766	14.45	10.87
H1201	39	2	1	166.6	58.5	21.0769	74	89.6	0.825893	15.72	15.59
H1229	27	1	1	174.8	54.5	17.8367	71.5	86	0.831395	16.72	9.81
H1231	32	1	2	176.8	66	21.1144	87.9	91.5	0.960656	17.4	14.33
H1327	40	1	2	163.7	69	25.7485	85	92.3	0.92091	11.5	14.64
R253	26	1	2	170.7	53	18.189	70	80.5	0.869565	15.89	13.93
H722	29	1	2	171.5	46.5	15.8097	64.5	83	0.777108	13.15	14.38
R256	25	1	2	165	55	20.202	70.5	87.5	0.805714	14.22	10.49
R257	28	1	2	169	68.5	23.9838	79	94	0.840426	15.57	13.6
R260	34	1	1	175.5	69.5	22.5648	85.5	96.3	0.88785	15.96	9.77
H1314	30	1	1	170.6	63	21.6462	73	93.6	0.779915	12.34	12.23
H1321	32	1	1	171.3	73.5	25.048	89.3	96.3	0.92731	15.54	13.17
H1311	29	1	2	170	67.5	23.3564	78.8	93	0.847312	12.8	11.76
H1330	25	1	1	161.5	55	21.0871	71	84.8	0.837264	17.04	11.42
H1329	45	1	1	165	69	25.3444	84.8	95	0.892632	16.92	11.33
H902	32	1	1	160.6	56.5	21.9057	78	84.5	0.923077	18.38	12.22
H903	33	1	2	162.1	54	20.5508	71	85.5	0.830409	14.25	13.24
H853	25	1	2	175	71	23.1837	79.7	94	0.847872	16.3	16.02
H1335	37	1	1	166	61	22.1367	81	91	0.89011	12.11	11.08
H1369	34	1	1	164.2	74	27.4464	90.5	95	0.952632	10.58	10.96
R220	37	1	2	169	68	23.8087	81.9	95.5	0.857592	13.65	14.96
H1363	52	1	2	169.3	82	28.6088	93	89.5	1.03911	16.31	10.73
H1364	25	1	2	160	56.5	22.0703	69.6	87	0.8	16.86	15.07
H292	38	1	1	164.4	74.5	27.5647	88.4	99	0.892929	20.04	14.58
H320	47	1	2	171.3	65	22.1513	83.7	91.8	0.911765	17.89	9.56
H354	44	2	2	166.2	72.5	26.2468	93.2	97	0.960825	11.44	14
H364	30	2	2	164	57.5	21.3786	75.6	89.7	0.842809	14.2	13.87
H285	44	1	2	167.8	76	26.9917	88	98	0.897959	15.42	11.59
H311	37	1	1	174.3	65.5	21.5599	82.6	93.9	0.879659	14.32	11.87
H336	33	1	1	165.6	58.5	21.3322	69	84.5	0.816568	18.4	15.71
H345	40	1	1	154	66.5	28.0401	89.7	95.5	0.939267	14.61	12.72
H373	32	1	2	170.3	58.5	20.171	71.8	88.8	0.808559	13.65	9.52
H355	42	1	1	173	58.5	19.5463	73	91.5	0.797814	14.27	12.11
H370	36	1	2	176.7	81	25.9425	92.6	100.5	0.921393	16.97	12.76
H309	46	1	1	170.5	66	22.7036	78.5	92.7	0.846818	12.51	10.97
H335	39	1	1	183	84	25.0829	83.4	101	0.825743	18.64	11.51
H1995	24	1	2	165	62.5	22.9568	83	86.7	0.957324	11.31	11.27
H2141	30	1	2	157.5	53	21.3656	74.4	82.9	0.897467	17.48	13.46
H1999	22	1	1	177	54.5	17.396	66.5	81.5	0.815951	13.67	13.43
H1023	37	1	2	171	67.5	23.084	82	90	0.911111	63.48	13.97
H1267	36	1	1	164.6	54	19.9312	69	88.2	0.782313	10.49	12.84
H1268	28	1	1	168	70	24.8016	80	92	0.869565	21.99	14.8
H130	31	1	1	160.7	54	20.9104	67.8	86.3	0.785632	10.19	16.02
H1340	26	1	1	169.3	60	20.9333	71	87	0.816092	11.11	8.42
H1374	39	1	1	168.4	52.5	18.5129	65.5	85	0.770588	12.58	10.17
H1458	27	1	1	164.1	77.5	28.7796	87.2	96	0.908333	10.47	10.78
H15	41	1	1	161	51	19.6752	68.3	83	0.822892	13.89	14.01
H16	26	1	1	165.7	73.5	26.7696	87.5	98	0.892857	13.64	12.47
H1651	40	1	1	175.5	55	17.857	65	86	0.755814	13.41	11.62
H1652	28	1	1	179.5	61	18.9322	76.2	87.4	0.871854	13.17	11.94
H1655	24	1	1	164	48.5	18.0324	69.8	82	0.85122	11.31	8.08
H1657	34	1	1	167	68	24.3824	86	89	0.966292	12.39	15.82
H1658	39	1	1	168	75	26.5731	85.1	93.1	0.914071	11.02	12.46
H1659	30	1	1	162.6	57	21.5593	72.1	87.8	0.821185	11.55	15.56
H1660	38	1	1	172	58	19.6052	67	85	0.788235	11.69	14.86
H1661	47	1	2	165.5	73	26.6518	85.7	98	0.87449	11.36	14.37
H1663	23	1	1	179.6	54	16.741	64.8	83.4	0.776978	16.08	14.61
H1666	22	1	1	172.7	56	18.776	67.7	89.2	0.758969	14.68	14.38
H1667	21	1	2	172.4	75	25.234	86.7	96.3	0.900312	16.9	14.72
H1668	26	1	1	169.2	59.5	20.7834	74.5	90	0.827778	15.64	8.45
H1670	44	1	1	161.6	67	25.6562	81	91	0.89011	14.89	11.59
H1673	26	1	1	174.7	58	19.0039	71.3	90	0.792222	10.32	13.41
H1675	23	1	1	171.2	68	23.2007	77.2	91	0.848352	10.1	9.73
H1677	23	1	2	167.2	72	25.7549	90	97	0.927835	15.41	14.32
H1680	29	2	1	166.9	58	20.8217	69	87	0.793103	17.91	15.14
H1681	35	1	1	171.2	71	24.2243	91.5	99	0.924242	14.7	12.58
H1683	31	1	1	164.2	55.5	20.5848	75.2	89.5	0.840223	13.89	14.74
H1684	25	1	1	159.1	49	19.3578	64.1	82.4	0.777913	15.57	15.13
H1686	30	1	1	175.5	74	24.0258	87.7	96.7	0.906929	15.83	11.89
H1687	22	1	1	168	71	25.1559	83	96	0.864583	16.75	16.49
H1688	27	1	1	164.5	54	19.9555	72	86	0.837209	14.65	11.68
H1689	30	1	1	158.6	44.5	17.6911	61.2	80	0.765	13.99	15.9
H1692	31	1	1	175.5	58	18.831	70.2	87	0.806897	14.15	10.4
H1693	35	2	2	167.4	71.5	25.515	86.8	95	0.913684	16.54	14.58
H1694	39	1	1	163.8	60.5	22.549	75.5	91.3	0.826944	16.52	12.33
H1699	40	1	2	177	69	22.0243	81	88	0.920455	12.63	15.15
H1702	30	1	2	159.5	53	20.8331	76	82.7	0.918984	14.18	11.83
H1704	24	1	1	174	60.5	19.9828	73	87	0.83908	17.95	9.84
H1706	35	1	1	169.5	70.5	24.5386	79.8	92	0.867391	21.22	16.07
H1707	33	1	1	164.7	64	23.5935	80.6	91.7	0.878953	12.68	14.98
H1708	22	1	2	177.1	75.5	24.0719	80.5	95.6	0.84205	14.97	13.01
H1711	31	1	1	172	65	21.9713	78.5	94	0.835106	9.53	11.26
H1712	31	1	1	166	52	18.8707	68.5	83.2	0.823317	11.84	13.25
H1713	36	1	1	166.5	82.5	29.7595	97.7	100	0.977	13.69	11.86
H1716	33	1	1	182.1	74	22.3158	81	97	0.835052	17.07	9.97
H1718	24	2	1	171	58.5	20.0062	68	88	0.772727	11.55	12.25
H1721	26	1	2	169	59	20.6575	74.5	84.6	0.880615	15.44	13.23
H1722	37	2	1	162	59	22.4813	77.5	90	0.861111	15.1	14.76
H1724	22	1	1	172	75	25.3515	76.5	97.8	0.782209	17.09	14.98
H1727	23	1	1	160	55	21.4844	72.5	85	0.852941	38.47	13.02
H1728	25	1	2	170.1	72.5	25.057	81.5	94	0.867021	16.55	13.24
H1729	24	1	2	179.6	66.5	20.6162	85.2	85	1.00235	12.03	10.49
H1730	42	1	1	170.5	60.5	20.8117	79.2	86.1	0.919861	16.25	12.44
H1732	25	1	2	168	64	22.6757	78	89	0.876404	10.56	13.71
H1733	29	1	1	168	50.5	17.8926	66.5	75.5	0.880795	16.62	14.14
H1736	41	2	1	166	62.5	22.6811	78	89	0.876404	18.22	13.55
H1742	40	1	1	167.6	58	20.6481	72.8	82.3	0.884569	17.46	14.91
H1746	52	2	2	173	62	20.7157	77	90	0.855556	15.91	14.92
H1747	25	1	1	164	64	23.7954	80.5	92.4	0.871212	16.18	13.1
H1748	32	1	2	175.5	64	20.7791	71.2	88.5	0.80452	10.86	14.97
H1749	45	1	1	161.5	70.5	27.0299	88.5	94.8	0.933544	16.06	12.44
H1752	34	1	1	163	68.5	25.7819	88	92	0.956522	15.46	10.15
H1753	39	1	1	165.2	64	23.4509	78.5	93.5	0.839572	18.96	11.65
H1754	24	1	2	173.5	63	20.9287	73	90	0.811111	35.88	12.05
H1755	28	1	2	169	58.5	20.4825	75.5	87.9	0.858931	12.66	14.17
H1756	26	1	1	170.1	78	26.9579	91.6	92.8	0.987069	15.86	13.18
H1757	24	1	1	170	81	28.0277	84.2	96.3	0.874351	12.13	12.46
H1758	36	1	2	167	54	19.3625	70.5	84	0.839286	11.6	10.81
H1759	21	1	1	166	77	27.9431	87.5	97.1	0.901133	14.54	11.01
H1760	22	1	1	165.1	53.5	19.6273	67.1	84	0.79881	14.61	15.7
H1765	36	1	2	162.8	65	24.5247	80	89.4	0.894855	12.08	13.75
H1768	23	1	1	179.5	80	24.8291	87	97.6	0.891393	12.66	12.05
H1769	25	1	2	169.5	63	21.9281	81.4	89.5	0.909497	12.35	13.15
H1770	22	1	2	168.2	52.5	18.557	78.7	82.5	0.953939	19.24	11.04
H1771	23	1	2	164.5	53	19.5859	68.5	81	0.845679	11.01	13.51
H1772	43	1	2	163.1	72.5	27.254	89.2	97	0.919588	12.68	15.52
H1773	42	1	1	173.7	64	21.2119	74.2	92	0.806522	13.77	14.03
H1776	30	1	2	159.8	55.5	21.734	73.5	87	0.844828	9.21	13.98
H1777	23	1	1	173.6	68.5	22.7296	80.1	89.3	0.896976	12.75	14.11
H1778	34	1	2	168.2	69	24.3892	89.7	95.5	0.939267	12.97	11.85
H1781	25	1	2	162.2	49	18.6249	66	83.5	0.790419	11.77	13.09
H1782	28	1	1	168.9	47	16.4755	61	82	0.743902	16.23	10.38
H1784	35	1	1	165.5	75	27.382	96.5	95	1.01579	14.78	13.34
H1785	31	1	1	172.5	74.5	25.0368	82	94	0.87234	16.78	14.41
H1786	31	2	1	172.5	70	23.5245	85.6	93	0.92043	13.53	15.9
H1787	40	1	2	164.5	57.5	21.2489	77	86.2	0.893271	9.84	14.51
H1788	41	2	1	159.1	66.5	26.2713	86.8	91.7	0.946565	20.06	14.5
H1789	31	1	2	169.1	66	23.0811	80	90.2	0.886918	15.24	14.61
H1790	30	1	2	165.2	56.5	20.7028	77.2	90.1	0.856826	13.82	12.91
H1793	37	1	1	165.5	57.5	20.9929	74.9	87.7	0.854048	16.47	13.57
H1796	27	1	1	167.8	49.5	17.5801	64.6	84.3	0.766311	12.83	9.8
H1800	35	2	2	170.6	69.5	23.8796	80.8	91	0.887912	14.82	10.41
H1802	26	1	2	163.5	45.5	17.0206	62.7	78.2	0.80179	12.07	15.58
H1806	31	1	1	166	67	24.3141	84.2	91.1	0.924259	12.36	11.35
H1808	31	1	1	175.5	71.5	23.2141	82	91.3	0.898138	17.75	11.48
H1809	28	2	2	173	60.5	20.2145	76.2	87	0.875862	9.23	13.83
H1810	22	1	1	168	51	18.0697	72.5	83	0.873494	12.58	12.38
H1812	29	1	1	175.5	89	28.8959	99	100.4	0.986056	12.12	13.31
H1815	39	1	1	169.2	55	19.2115	71	82	0.865854	14.58	16.58
H1816	32	1	1	177	61	19.4708	74	90.6	0.816777	10.83	15.65
H1824	33	1	1	169	64.5	22.5832	82.5	91.8	0.898693	8.96	10.01
H1827	32	1	1	175.5	65	21.1037	81.2	90	0.902222	16.55	14.86
H1828	22	1	2	175.6	57.5	18.6474	69	84	0.821429	11.82	15.58
H1829	27	1	2	166	57	20.6852	72.5	84.7	0.855962	13.05	13.37
H1832	27	1	1	173.1	62	20.6918	76	87.7	0.866591	13.77	12.63
H1839	24	1	2	169	64	22.4082	74.2	91.3	0.812705	14.68	16.22
H1842	40	2	1	165.5	58.5	21.358	70	88.5	0.79096	12.39	13.63
H1843	35	2	2	167.5	72.5	25.8409	85.3	95	0.897895	13.89	12.17
H1844	29	1	1	166.1	50.5	18.3043	68.5	79	0.867089	16.75	10.27
H1847	21	1	1	164.7	61.5	22.6719	69.8	96.1	0.726327	15.38	12.09
H1848	29	1	1	166.5	56.5	20.3807	73.5	85.4	0.860656	11.13	10.2
H1850	28	1	1	161.5	60.5	23.1959	79.1	90	0.878889	12.8	11.11
H1853	32	1	1	171.8	52	17.618	71.2	80.2	0.887781	18.2	14.31
H1855	36	1	1	162.1	76.5	29.1136	94.6	98	0.965306	9.63	15.2
H1856	34	1	1	171.7	61.5	20.861	74.6	93	0.802151	13.96	11.98
H1857	21	1	1	170	81.5	28.2007	88	102.5	0.858537	18.74	12.56
H1858	33	1	2	172.1	56.5	19.076	68.2	83	0.821687	19.26	11.54
H1860	34	1	1	176.5	69	22.1493	80	90.3	0.885936	11.57	8.68
H1865	23	1	1	165.5	72.5	26.4693	92	88.5	1.03955	9.43	13.74
H1868	25	1	1	176	84.5	27.2792	92.2	102.8	0.896887	11.16	15.85
H1870	26	1	2	162.2	66.5	25.2767	81	96.2	0.841996	10.66	13.02
H1872	25	1	2	168	50	17.7154	68	82	0.829268	12.25	11.63
H1873	33	1	2	165	60	22.0386	78	93	0.83871	13.94	15.24
H1875	36	1	2	170.5	64	22.0156	78.2	89	0.878652	10.81	14.76
H1878	30	1	2	167.2	70	25.0395	86	97.5	0.882051	12.59	12.38
H1882	25	1	1	167	55	19.721	67.5	84.5	0.798817	18.35	13.54
H1883	35	2	1	160.2	66	25.7169	81.6	89.3	0.913774	11.48	15.7
H1886	31	2	2	162.4	50.5	19.1478	72	86	0.837209	8.2	11.09
H1887	25	1	1	174.1	62	20.4547	70.6	91.6	0.770742	14.76	13.51
H1889	29	1	1	171	68	23.255	81.1	94.2	0.860934	11.31	11.72
H1891	34	1	1	160.8	77.5	29.973	93.1	100.2	0.929142	9.98	14.32
H1892	25	1	1	168.7	52.5	18.4471	69	86	0.802326	16.54	14.44
H1902	28	1	1	168.2	55	19.4406	68.1	87.7	0.776511	12.73	12.29
H1905	28	1	1	162.6	62	23.4504	76.2	90.1	0.845727	15.78	11.7
H1907	31	1	1	165.4	58.5	21.3838	76.8	87.4	0.878719	17.11	11.03
H1909	35	2	1	172	65.5	22.1403	74	89	0.831461	14.36	14.27
H1912	38	2	2	168	64	22.6757	84	91.5	0.918033	12.73	15.77
H1914	33	1	2	163.4	69	25.8431	81.1	97	0.836082	11.89	10.9
H1917	24	1	2	168.3	55.5	19.5941	72.3	84	0.860714	12.61	10.25
H1927	21	1	1	174.4	67	22.0283	83.8	94.5	0.886772	10.42	11.67
H1928	30	1	1	168.1	75	26.5415	83.7	93.5	0.895187	28.74	15.23
H1932	25	1	1	172	68	22.9854	71	91.5	0.775956	13.1	14.71
H1933	27	1	1	172	57	19.2672	70.5	85.5	0.824561	11.52	13.11
H1944	29	1	2	173	65	21.7181	77.4	90	0.86	12.44	12.31
H1948	29	1	2	163.6	71	26.5272	84.6	92	0.919565	12.13	13.16
H1950	30	1	1	172.5	74	24.8687	84.6	97	0.872165	11.6	14.43
H1953	30	1	2	170	72.5	25.0865	85.3	93.7	0.910352	12.35	15.28
H1956	44	1	1	174.3	86.5	28.4722	99.1	99	1.00101	12.98	14.37
H1957	39	1	2	172.5	69.5	23.3564	86	93.5	0.919786	15.03	13.48
H1960	34	1	1	166.5	64	23.0861	87.2	91.8	0.949891	11.38	9.96
H1961	32	1	1	166.3	64	23.1417	75	91.8	0.816993	13.07	10.85
H1964	28	1	2	163.5	72	26.9338	87.5	96	0.911458	11.16	14.26
H1965	30	1	2	165.1	58.5	21.4616	78	86	0.906977	11.52	11.75
H1966	31	1	1	167	64.5	23.1274	76.8	91.5	0.839344	12.78	13.14
H1967	25	1	1	166	55	19.9594	69	81.5	0.846626	17.09	10.32
H1979	20	1	2	169	57.5	20.1323	70.4	84	0.838095	11.04	13.65
H1980	20	1	2	165.5	50	18.2547	68.5	84.2	0.813539	16.47	12.97
H1981	26	1	2	172.4	56	18.8414	72	84	0.857143	11.89	14.9
H1986	35	1	1	165	69	25.3444	85	93.2	0.912017	12.22	15.8
H1988	29	1	2	165	52.5	19.2837	67.4	83	0.812048	12.05	13.58
H1997	30	1	2	170.5	91.5	31.4755	100	100.2	0.998004	15.17	12.2
H1998	36	1	1	169	57	19.9573	67.5	84.5	0.798817	14.85	14.17
H2002	36	1	2	171	80.5	27.5298	95.5	102.5	0.931707	11.67	14.26
H2003	22	1	1	172.3	63	21.2212	77.5	89.7	0.863991	14.71	11.71
H2005	22	1	1	184.3	67.5	19.8725	78.4	92	0.852174	12.66	15.16
H2008	23	1	2	164.6	52	19.193	66	84.5	0.781065	11.45	13.03
H2009	25	1	1	173.6	69	22.8955	88.2	93	0.948387	12.12	12.53
H2010	47	1	1	167.2	65.5	23.4298	87	89	0.977528	11.77	11.83
H2011	24	1	1	171.2	56.5	19.2771	72	81.4	0.884521	11.6	11.67
H2012	36	1	2	168	68.5	24.2701	84.3	93	0.906452	13	14.48
H2013	34	1	1	165.5	56.5	20.6278	74.4	88.5	0.840678	12.36	11.4
H2015	28	1	1	178.2	62	19.5243	74.2	88	0.843182	11.45	12.61
H2016	31	1	1	174.1	78	25.7334	89	97.5	0.912821	11.8	11.8
H2017	22	1	1	174	64	21.1389	76.3	88	0.867045	16.28	12.84
H2044	23	2	1	175.5	78	25.3245	85	97.2	0.874486	10.9	13.58
H2046	32	1	1	168.5	55	19.3715	74.6	83.2	0.896635	13.57	14.3
H2048	33	1	1	165.5	77	28.1122	94	95.6	0.983264	12.31	13.33
H2054	36	1	1	170.5	78	26.8316	92.5	93	0.994624	23.17	9.61
H2055	26	2	2	160	52	20.3125	78	85.3	0.91442	14.82	15.15
H2056	40	1	2	163.6	53.5	19.9888	71	86.1	0.824623	13.1	12.42
H2099	29	1	2	164.1	64.5	23.952	80.3	92.5	0.868108	16.6	14.47
H2102	47	1	1	167.2	86.5	30.9417	98.6	103.8	0.949904	18.91	12.89
H2103	32	1	2	169.5	66	22.9723	80	91.4	0.875274	14.58	14.81
H2104	33	1	2	168.6	52	18.2931	70	83	0.843373	13.86	13.3
H2105	34	1	1	168.5	66.5	23.4219	85.1	91.2	0.933114	16.3	13.22
H2111	30	1	1	170	78	26.9896	86	98.4	0.873984	10.76	16.21
H2113	23	1	1	168	56.5	20.0184	72.1	86.5	0.833526	9.21	13.65
H2114	32	1	1	170.6	59	20.2719	75	84	0.892857	10.74	12.32
H2117	30	1	2	162.2	62.5	23.7563	85	89.2	0.952915	16.03	9.25
H2121	33	1	1	174	83.5	27.5796	98	98	1	12.13	9.65
H2124	32	1	1	174.2	63	20.7608	75	92	0.815217	13.77	10.6
H2128	25	1	2	169.5	57	19.8397	72.5	88	0.823864	10.54	11.26
H2129	57	1	1	160.4	56.5	21.9604	79.5	88.6	0.897291	9.81	9.23
H2136	24	1	1	161	50.5	19.4823	64.5	81.8	0.788509	7.66	8.54
H2138	30	1	1	167	72	25.8166	88	97.2	0.90535	13.74	10.39
H2139	25	2	1	172.6	84.5	28.3645	91.5	100	0.915	18.27	11.05
H2140	26	1	2	168.5	62	21.8369	74.5	88.5	0.841808	15.59	11.64
H2216	32	1	1	176.5	73	23.4333	79.5	93	0.854839	16.88	13.89
H248	22	1	1	169.2	74.5	26.0229	86.5	93.4	0.926124	11.21	12.98
H262	34	1	1	168.8	52.5	18.4253	67	82	0.817073	17.07	10.14
H263	44	1	2	183.5	64.5	19.1552	75.8	87.5	0.866286	13.15	15.65
H265	31	1	1	161.6	59.5	22.7842	79.7	91	0.875824	13.59	14.43
H290	29	1	1	159.2	45	17.7552	63.5	81.2	0.78202	10.34	14.3
H294	33	1	2	163	67	25.2174	85.6	91.8	0.932462	12.01	13.58
H306	32	1	2	165.2	53	19.4203	79.8	90.8	0.878855	18.86	14.03
H325	27	1	1	166.5	89	32.1042	94.2	104.4	0.902299	14.31	11.85
H357	26	1	1	168.8	86	30.1824	88	101.8	0.86444	11.65	15.31
H422	23	1	2	170	50	17.301	70	82.2	0.851582	11.31	11.96
H458	31	1	1	174.6	81	26.5703	93.3	101.2	0.921937	13	12.63
H484	39	1	1	170.5	81	27.8635	94.2	94.2	1	12.15	16.19
H506	25	1	2	169.7	64	22.2237	77	90.5	0.850829	12.9	13.57
H508	29	1	2	165	54.5	20.0184	70	82.5	0.848485	12.78	9.38
H520	23	1	1	166.7	62.5	22.491	74	86	0.860465	15	12.95
H533	46	1	1	157.5	70	28.2187	86.5	93.6	0.924145	12.15	15.57
H562	33	1	1	176.5	76	24.3963	89.3	90.7	0.984564	8.86	10.45
H619	30	1	1	166.5	75.5	27.2344	80.5	97.5	0.825641	16.73	14.33
H636	25	1	1	162.1	50.5	19.2188	69	83.9	0.822408	17.28	12.81
H638	27	1	2	165.7	75	27.3159	90	98	0.918367	14.99	10.73
H639	22	1	2	165.7	75	27.3159	86	103	0.834951	12.54	11.38
H667	36	1	1	159.2	78.5	30.973	98.5	98.4	1.00102	14.57	12.33
H668	26	1	2	161.6	64.5	24.6989	81	87.2	0.928899	7.73	12.11
H672	24	1	2	179.2	85.5	26.625	93	101	0.920792	12.66	12.75
H673	37	1	1	168.9	56	19.6304	68.8	82	0.839024	11.94	9.65
H694	27	1	1	174.6	96	31.4907	97.3	108	0.900926	13.49	11.76
H799	26	1	2	173	75	25.0593	90.3	99.2	0.910282	12.29	14.06
H800	27	1	1	162.3	55	20.8798	70	87.8	0.797267	15.66	15.69
H808	35	1	1	175	77	25.1429	89	93	0.956989	16.46	12.73
H82	28	1	1	171	76	25.9909	93	98	0.94898	13.2	12.44
H825	25	1	2	165.9	68	24.7068	78	89.2	0.874439	15.4	11.53
H827	30	2	1	171.7	67.5	22.8962	82	91	0.901099	12.93	11.38
H832	40	2	2	158.4	62	24.7105	83.2	90.3	0.921373	19.83	15.67
H835	27	1	1	161.6	49	18.7635	67	82	0.817073	14.77	12.34
H865	31	1	2	173.7	78.5	26.0178	88.2	101.3	0.870681	13.58	10.77
H873	29	1	2	167.2	59.5	21.2836	74.2	88.8	0.835586	14.94	15.14
H892	24	1	1	163	59	22.2063	73	87.2	0.837156	10.68	14.03
R1003	22	1	2	165.5	50	18.2547	62	79	0.78481	15.94	9.73
R1004	25	1	2	162.2	58	22.0458	73.6	86.5	0.850867	17.35	14.99
R1007	50	1	2	163.6	60	22.4174	79.6	85	0.936471	10.56	11.15
R1019	34	1	1	168.5	92	32.4032	100.5	101.2	0.993083	13.98	13.95
R1020	35	1	1	174.5	73	23.9735	80.7	93.4	0.864026	13.3	14.48
R1021	24	1	1	175.2	70	22.805	79	89.3	0.884658	10.97	12
R1023	36	1	1	162	59.5	22.6718	76	90	0.844444	11.44	13.51
R1027	39	1	1	166	53.5	19.415	68.5	83	0.825301	12.56	10.86
R1029	28	2	2	170.8	67.5	23.1381	84.5	95.5	0.884817	19.65	14.17
R1034	44	1	1	160.7	68	26.3316	87	95.5	0.910995	42.27	13.02
R1035	33	1	1	169	82.5	28.8855	95	98	0.969388	10.41	15.86
R1036	29	1	1	166.1	54	19.5729	69.5	81.3	0.854859	11.24	13.47
R1041	45	1	1	171	71	24.281	85	90.6	0.93819	14.49	10.75
R1042	42	1	1	164.1	57	21.1669	75.5	85.4	0.884075	9.87	15.91
R1044	26	1	1	165	52	19.1001	65.2	78	0.835897	11.24	14.33
R1046	23	1	2	177	66	21.0667	79.2	90.3	0.877076	16.74	15.6
R1047	27	1	1	178	79	24.9337	93.7	99.2	0.944556	12.27	9.85
R1051	30	1	2	174.2	76	25.0448	93.4	97	0.962887	8.75	12.32
R1054	38	1	1	166	84.5	30.6648	95.3	94	1.01383	17.72	10.4
R1056	32	1	2	172.6	84	28.1967	94.6	99	0.955556	12.54	13.77
R1057	34	1	1	164	75	27.8852	87.5	93	0.94086	16.91	15.04
R1058	47	2	1	167.7	56	19.9123	71	85.5	0.830409	15.67	15.41
R1059	36	1	1	174.6	78	25.5862	87.8	96.8	0.907025	9.38	9.25
R1064	28	1	1	164.5	56	20.6946	68	82	0.829268	16.85	13.66
R1065	39	1	1	167.6	67.5	24.0301	87.4	89.2	0.979821	12.76	9.76
R1066	43	1	1	173	71.5	23.8899	86	95.5	0.900524	13.7	12.66
R1067	32	1	1	172.8	54.5	18.2519	70.5	84	0.839286	10.76	12.4
R1069	35	1	1	167.2	69	24.6818	79.4	96	0.827083	14.32	14.29
R1070	34	2	1	172.4	85	28.5986	96.3	103.5	0.930435	11.96	12.42
R1071	40	1	1	170	64	22.1453	77.9	89	0.875281	11.07	13.92
R1075	44	1	1	161.5	51	19.5535	65.6	83	0.790361	15.74	11.62
R1076	24	1	2	170.2	56	19.3316	71	85	0.835294	13.97	11.55
R1077	23	1	2	173.1	71	23.6954	77	95.1	0.809674	10.15	13.85
R1079	34	1	2	163.4	63	23.5959	79.1	88	0.898864	11.6	10.84
R1081	28	1	2	172	74	25.0135	83.7	98.3	0.851475	9.49	14.38
R1082	29	1	1	178.4	77	24.1936	82.3	97	0.848454	8.43	12.99
R1084	41	1	1	160.6	55	21.3241	66.8	84	0.795238	14.19	16.02
R1085	38	2	1	168	63	22.3214	82	90	0.911111	14.7	13.07
R1087	24	1	1	172.7	80.5	26.9905	88	93	0.946237	11.45	13.13
R1088	41	2	1	169.5	51	17.7513	66	81	0.814815	11.14	14.91
R1089	24	1	1	162.2	57.5	21.8558	75.6	88.1	0.858116	16.32	15.51
R1090	28	1	1	172.1	92.5	31.2306	94.5	106.8	0.884831	16.44	12.7
R1092	30	2	1	162	72	27.4348	84	94	0.893617	14.78	12.51
R1094	27	1	1	169	54	18.9069	68.6	83	0.826506	8.94	11.1
R1097	34	1	1	165.7	64	23.3096	80.9	88	0.919318	14.2	14.53
R1100	28	1	1	161.6	78	29.8684	91	96.5	0.943005	22.42	10.21
R1103	21	1	2	168.1	54.5	19.2868	69	84	0.821429	13.22	12.46
R1104	29	1	1	181.1	76.5	23.3252	80.2	96.8	0.828512	34.57	11.92
R1105	24	1	2	163.5	54.5	20.3874	69.1	86.7	0.797001	9.26	12.95
R1106	22	1	2	167.2	58	20.747	72.3	86.8	0.832949	17.62	11.48
R1107	34	2	2	169.1	50	17.4857	62	78.6	0.788804	14.52	16.35
R1109	21	1	1	178.5	58	18.2034	72.9	82	0.889024	14.35	13.83
R1110	22	1	2	164	56	20.8209	71.3	86	0.82907	12.24	13.24
R1111	31	1	2	154.5	57	23.8791	77	84	0.916667	13.61	9.73
R1113	27	1	2	168.3	72	25.4193	83.1	92	0.903261	17.92	13.12
R1118	30	1	1	176.3	64	20.5909	74.3	93.1	0.798067	11.9	14.26
R1125	34	2	1	169.1	61	21.3325	73.1	89.4	0.817673	21.76	14.3
R1126	35	1	2	165.8	68.5	24.9185	91	96	0.947917	43.59	13.69
R1128	37	1	2	170.2	65.5	22.6111	81	91	0.89011	17.18	11.92
R1134	26	1	2	167.5	70.5	25.1281	87.1	95.5	0.912042	16.43	10.24
R1136	21	2	1	166.1	63.5	23.0162	75.6	91.4	0.827133	16.6	13.93
R1137	21	1	1	165.6	57.5	20.9675	75.9	87	0.872414	16.09	14.34
R1140	24	1	1	172	65.5	22.1403	79.3	89.5	0.886034	18.25	13.141
R1146	23	1	2	169.5	53.5	18.6215	69.4	83	0.836145	20.17	14.2
R1149	39	1	1	172.3	85	28.6318	96.4	101.3	0.951629	13.56	15.31
R1150	43	1	2	159.5	51	20.047	68	81	0.839506	14.84	13.01
R1152	30	2	2	157.5	64	25.7999	83	89	0.932584	15.49	12.37
R1154	32	2	1	173	61.5	20.5486	71	88.2	0.804989	13.95	10.69
R1155	22	1	1	175	51.5	16.8163	64.2	83.2	0.771635	15.59	14.05
R1156	30	2	2	170.5	66.5	22.8756	74.2	93	0.797849	14.55	12.81
R1157	35	1	1	164.2	63	23.3665	78.2	92	0.85	13.56	10.99
R1161	40	1	1	164.5	64.5	23.8357	81.8	93	0.87957	12.9	10.08
R1164	41	1	1	161	61	23.533	77.4	91	0.850549	15.69	11.98
R1165	36	1	1	158	68	27.2392	82.3	94.1	0.874601	23.24	13.91
R1168	22	1	1	164.6	55	20.3003	70	86	0.813953	13.19	11.59
R117	35	1	1	162	54	20.5761	75.3	85.4	0.881733	13.42	15.37
R1171	22	1	2	169.7	56	19.4457	68.2	86.7	0.786621	12.81	14.25
R1178	22	1	1	156	63	25.8876	87	86.6	1.00462	12.01	10.48
R1182	25	1	2	172	57	19.2672	70.5	87	0.810345	10.41	11.08
R1190	25	1	2	175.7	63	20.4078	78.5	90.5	0.867403	13.62	13.36
R1192	34	1	2	163.5	50	18.704	61	80.6	0.756824	16.15	14.1
R1194	41	1	2	183.5	90	26.7282	98	104	0.942308	11.93	15.25
R1195	26	1	1	168	51	18.0697	63.5	82.3	0.771567	12.22	13.76
R1198	28	1	1	167	65	23.3067	76	92.5	0.821622	9.57	12.74
R1199	27	1	1	170.5	75	25.7996	91.5	96	0.953125	13	9.48
R1202	30	1	1	169.7	68.5	23.7863	75	87	0.862069	13.43	12.86
R1204	42	1	1	172.3	58	19.537	70	85	0.823529	13.79	10.76
R1237	43	1	1	163.5	67.5	25.2504	81.5	91	0.895604	20.51	11.27
R1241	35	1	1	173.9	73.5	24.3046	85.8	96.1	0.89282	13.49	11.35
R1242	34	1	1	164	52	19.3337	70	85	0.823529	9.04	13.73
R1244	29	1	2	165	51	18.7328	73	79	0.924051	11.8	13.87
R1247	36	1	1	162.1	61	23.2147	78	90	0.866667	13.65	12.42
R1249	38	1	1	162.2	63.5	24.1364	85	90.5	0.939227	9.15	14.17
R1250	29	1	2	170.6	58	19.9283	69.2	86.5	0.8	13.17	16.11
R1251	25	1	2	162	50	19.052	68	78.5	0.866242	11.14	11.71
R1253	25	1	1	180.5	73.5	22.5597	84.5	97	0.871134	12.69	13.32
R1255	28	1	1	170.2	55.5	19.159	74.8	88.2	0.848073	13.53	15.63
R1256	25	1	1	162	53	20.1951	69	83.9	0.822408	12.56	11.48
R1258	32	1	1	164	58.5	21.7504	72	85.6	0.841121	14.43	9.97
R1259	36	1	2	167	63	22.5896	81.5	88	0.926136	16.05	11.82
R1261	35	1	1	156.7	51	20.7698	67	80.8	0.829208	11.48	11.23
R1263	29	2	1	161.5	49	18.7867	60.5	81	0.746914	10.36	10.02
R1267	22	1	1	179.4	80.5	25.0121	86.1	100.6	0.855865	14.8	13.73
R1268	28	1	1	165.8	51	18.5524	68.2	83.2	0.819712	19.33	11.57
R1295	36	2	2	164.2	67.5	25.0356	89.5	95.8	0.934238	8.37	12.35
R1297	31	1	1	153.3	75	31.9137	92.9	99.1	0.937437	11.25	12.16
R1299	33	1	2	172.5	80.5	27.0531	90.9	97.7	0.930399	16.92	16.48
R1300	42	1	2	169.1	75	26.2285	91	98.3	0.925738	13.57	12.83
R1301	35	1	1	161	71.5	27.5838	83.2	94.3	0.882291	11.11	10.57
R1302	33	1	1	171.1	58	19.812	74.5	86.7	0.859285	13.35	12.34
R1305	35	1	1	166.8	60	21.5655	78.3	90.7	0.863286	14.9	15.3
R1306	34	1	1	161	56.5	21.797	73.5	88	0.835227	12.95	13.16
R1309	23	1	2	165.3	49	17.9329	71	83	0.855422	13.37	11.05
R1310	24	1	2	173.7	65.5	21.7091	73.5	91.3	0.805038	14.55	15.71
R1312	26	1	1	160.6	52.5	20.3549	70.5	85.5	0.824561	14.63	15.8
R1315	22	1	2	177	63.5	20.2688	72	87	0.827586	10.81	16.14
R1326	29	1	1	157	53	21.5019	71	85.5	0.830409	8.15	13.41
R1327	23	1	1	157.5	50	20.1562	69	82	0.841463	12.14	16.23
R1328	23	1	1	170.2	69.5	23.992	82	93.2	0.879828	12.58	14.82
R1330	24	1	1	157	43.5	17.6478	63	78	0.807692	18.08	11.48
R1331	26	1	2	167.5	52	18.5342	68.1	85	0.801176	11.74	13.54
R1333	22	1	1	160	50	19.5312	64	84	0.761905	10.17	10.77
R1336	28	1	1	173.1	57	19.0231	70.5	87.7	0.803877	11.79	15.03
R1337	39	2	1	170.5	58.5	20.1237	71	86.8	0.817972	9.61	14.37
R1340	31	1	1	166.2	63.5	22.9886	73.6	91	0.808791	10.44	16.16
R1341	31	2	2	165.7	54.5	19.8496	74	86	0.860465	14.26	13.66
R1342	35	1	2	171	74	25.3069	85.5	95.5	0.895288	10.36	14.12
R1343	40	1	2	168.3	59	20.8297	73.7	89	0.82809	11.26	14.14
R1346	32	1	1	165	70	25.7117	89	92.5	0.962162	11.31	13.82
R1347	22	2	1	166	72	26.1286	80.1	95.8	0.836117	12.2	9.23
R1348	24	2	1	173.2	52.5	17.501	67	84	0.797619	43.61	11.77
R135	29	1	1	174.1	75	24.7436	80	94	0.851064	8.2	12.67
R1354	29	1	1	167.2	55	19.6739	72	83	0.86747	11.54	10.3
R1394	28	1	2	171	63	21.5451	71	87	0.816092	29.7	13.55
R1395	37	1	1	174	58	19.1571	74	82.8	0.89372	14.7	13.32
R143	33	2	2	172	61	20.6193	72.6	88	0.825	25.14	11.45
R1431	29	1	1	171	66	22.571	81.7	92.3	0.885157	13.34	12.24
R1436	39	1	1	167.7	56	19.9123	72.3	84	0.860714	13.35	14.39
R1550	24	1	1	166.5	52	18.7575	67.5	81	0.833333	11.82	11.61
R1551	22	1	1	181.6	63.5	19.2549	70	95	0.736842	10.27	11.02
R1559	26	2	2	157.5	54	21.7687	66	83	0.795181	17.48	10.92
R1564	22	1	1	172.8	56	18.7543	72.6	86	0.844186	18.52	14.47
R1567	27	2	2	161.3	53	20.3708	64.3	87	0.73908	16.78	12.39
R1570	26	1	1	168.9	59.5	20.8573	72.8	86.2	0.844548	47.55	14.88
R1572	27	1	2	164.5	65	24.0205	72.5	90.8	0.798458	14.03	15.42
R1573	21	2	2	161.7	47	17.9754	68.6	82.1	0.835566	13.6	13.28
R1574	38	1	1	165.6	67	24.4317	83.6	97.8	0.854806	14.51	14.16
R1576	30	1	1	163.8	52	19.381	66	84.6	0.780142	12.63	14.89
R1577	29	2	1	168.5	59.5	20.9564	75.5	85.3	0.885111	12.97	9.54
R1578	31	1	1	171	67	22.913	82.5	89.5	0.921788	14.32	12.88
R1579	25	1	2	160.2	61	23.7687	85	85.5	0.994152	14.23	10.99
R1593	31	1	2	174.2	74	24.3857	92.5	96.5	0.958549	17.14	10.02
R16	31	1	1	174.2	111.5	36.7433	109.3	110.4	0.990036	9.9	10.59
R1610	26	1	2	163.1	61.5	23.1189	74.5	90.5	0.823204	11.07	13.93
R1611	32	1	1	167.5	52.5	18.7124	65.5	82.5	0.793939	14.85	14.09
R1612	25	1	2	164	68	25.2826	84.6	89.3	0.947368	13.94	9.35
R1615	41	1	2	163	64	24.0882	84.6	90	0.94	10.56	13.34
R1619	37	2	1	152	69	29.865	92.8	93.5	0.992513	11.36	11.96
R1621	37	1	1	173.7	100	33.1437	99.8	109	0.915596	17.26	16.22
R1624	28	1	1	166.7	47	16.9132	66.7	84	0.794048	11.6	14.5
R1628	30	1	2	168.5	61	21.4847	76	86.5	0.878613	15.49	13.83
R1630	25	2	1	167.2	69	24.6818	79.8	93	0.858065	14.09	13.52
R1631	28	1	1	165	53.5	19.6511	72.1	83	0.868675	12.9	15.3
R1638	25	1	2	168.5	70	24.6546	84	96.5	0.870466	15.23	16.6
R164	25	2	2	166.5	72	25.9719	87.5	94	0.930851	13.25	10.79
R1642	24	2	1	183.5	61.5	18.2643	81.2	88	0.922727	23.36	12.73
R1648	33	1	2	171.3	74.5	25.3888	88.8	96.7	0.918304	11.16	14.84
R1650	22	1	2	173.2	62.5	20.8346	72.5	88.5	0.819209	6.66	13.24
R1651	37	1	2	163.2	62.5	23.466	79.5	91	0.873626	11.91	14.26
R1653	34	1	2	162.5	74	28.0237	91.3	97	0.941237	15.64	15.85
R1655	33	1	1	178.5	80.5	25.265	88	99	0.888889	16.15	13.92
R1658	32	2	1	167.8	61.5	21.8419	75.2	89.5	0.840223	13.42	13.83
R1660	31	1	1	168.2	64	22.6218	78.5	90.5	0.867403	11.8	15.95
R1661	24	1	1	169	56.5	19.7822	68.2	85.8	0.794872	14.18	16.39
R1662	34	1	2	160.5	69	26.7855	83.2	92.5	0.899459	14.73	16.09
R1664	33	1	2	171.5	74	25.1596	84.6	96.2	0.879418	12.31	11.94
R1669	40	2	2	162.8	77.5	29.241	95	96.6	0.983437	11.23	15.61
R1676	26	1	1	176.8	116	37.1102	107	116.3	0.920034	13.52	15.96
R1677	30	1	1	162.1	62.5	23.7856	81.2	93.5	0.868449	21.01	14.58
R1680	37	1	1	165.7	70	25.4949	82.8	94.1	0.879915	11.03	11.26
R1681	24	1	2	163	66	24.841	79.1	96	0.823958	15.64	15.11
R1682	25	2	2	162.6	55	20.8028	72.3	84	0.860714	9.41	15.52
R1683	22	1	2	163	55.5	20.889	66.8	85.3	0.783118	11.7	15.6
R1685	28	1	2	167.1	67.5	24.1741	79.2	92	0.86087	13.2	11.54
R1690	25	1	2	160	62	24.2187	73	86	0.848837	11.57	15.52
R1692	39	1	2	176.3	77.5	24.9343	91.4	99.3	0.920443	13.07	14.78
R1693	30	1	2	171.8	52	17.618	63	82	0.768293	16.08	15.93
R1694	25	1	2	158.1	60	24.0042	80	87	0.91954	15.14	12.74
R1698	34	1	2	166	52	18.8707	69.3	84	0.825	20.71	15
R1699	26	1	2	177.6	89	28.2166	87.6	102.8	0.85214	13.02	11.41
R1700	22	1	2	164	53	19.7055	69	85	0.811765	14.51	10.52
R1712	27	1	2	173.1	60	20.0243	78	83	0.939759	13.96	11.12
R1746	30	1	2	168	66	23.3844	75.1	87	0.863218	14.21	14.97
R176	34	1	1	167.5	78	27.8013	93.2	96.5	0.965803	12.66	10.31
R1774	40	1	1	167	72	25.8166	87.3	97	0.9	12.39	11.28
R1778	41	2	1	174.5	52	17.077	67.2	80.5	0.834783	14.16	12.11
R1781	39	2	2	166.3	60	21.6954	75.6	93.8	0.80597	12.9	13.12
R1783	29	1	2	164	61	22.68	75	90	0.833333	10.77	15.38
R1784	24	1	1	165.3	57.5	21.0437	69.2	85.2	0.812207	18.76	11.73
R1785	25	1	2	166.1	56.5	20.479	66.6	87	0.765517	11.31	11.92
R1787	24	1	1	173	57.5	19.2121	69	85	0.811765	17.7	13.49
R1788	21	1	1	172	60	20.2812	69.8	85	0.821176	14.65	13.12
R1790	36	1	1	165	67.5	24.7934	81.6	90	0.906667	12.37	10.14
R1791	36	1	2	166	53.5	19.415	68	84.3	0.806643	12.2	11.61
R1797	29	1	1	169.5	69	24.0165	85.6	92.5	0.925405	16.6	12
R1799	31	1	2	167.7	65	23.1125	80.6	90.5	0.890608	15.74	15.97
R1802	40	1	2	163	56.5	21.2654	77.2	85.6	0.901869	10.88	10.45
R1803	26	1	2	166.5	54	19.4789	71	87	0.816092	12.63	13.08
R1804	23	1	2	178	60	18.937	71.2	88.5	0.80452	13	9.78
R1806	30	2	1	174.5	83	27.2576	93	102.2	0.90998	16.23	13.98
R1808	25	1	1	168.5	60	21.1325	81	88.6	0.914221	14.45	10.13
R1811	23	1	1	164.5	62	22.9118	69.5	89.5	0.776536	15.61	14.37
R1812	27	1	1	170.2	76	26.2358	85.8	96.8	0.886364	15.51	9.49
R1813	26	1	2	174.6	57.5	18.8616	70.3	85	0.827059	14.23	10.54
R1814	34	1	1	162	48	18.2899	68.5	78.8	0.869289	10.86	11.07
R1815	27	1	2	172.7	70	23.47	74.5	93	0.801075	13.54	13
R1816	25	1	2	152.5	53.5	23.0046	67.4	85	0.792941	7.14	11.85
R1817	34	1	2	168.6	67	23.57	72.5	89.9	0.806452	12.61	15.37
R1818	31	1	2	160.4	60	23.3208	77.8	89.5	0.869274	11.04	14
R1819	21	2	2	168.5	50	17.6104	62.6	82.5	0.758788	12.71	14.02
R1820	28	1	1	177	57	18.194	67.5	85	0.794118	17.04	12.23
R1823	39	1	1	165.5	53	19.35	71.8	81.3	0.883149	12.2	12.86
R1824	20	1	2	169.8	60.5	20.9836	73	84.2	0.866983	16.97	11.15
R1829	24	1	1	158.6	52	20.6727	68.4	80	0.855	15.16	13.98
R1833	30	2	2	174.2	80	26.3629	89	96.2	0.925156	10.37	16.37
R1834	31	1	1	176.5	84.5	27.1248	94	103	0.912621	13.5	12.77
R1835	23	2	2	164.8	44	16.2009	63	78.5	0.802548	11.23	16.6
R1839	26	1	1	173.9	70	23.1472	78.3	95.8	0.817328	13.48	14.48
R1840	25	1	1	164.5	49	18.1077	68.5	80.5	0.850932	12.63	11.28
R1842	54	1	2	164.7	59.5	21.9346	78	85	0.917647	9.91	12.78
R1843	38	1	2	165.5	59	21.5405	82	86.7	0.94579	17.36	14.86
R1844	24	2	2	165.8	51.5	18.7343	70.8	82	0.863415	10.87	13.92
R1848	28	1	1	162	58	22.1003	70	87.5	0.8	14.95	14.53
R185	23	2	2	164.5	52	19.2164	67.5	81.5	0.828221	12.54	15.22
R1852	35	1	2	169	60.5	21.1827	71	88.4	0.803167	12.47	15.08
R1853	29	1	2	168.7	51	17.9201	71	85	0.835294	10.34	13.23
R1855	22	1	2	169.5	62	21.58	71	85.3	0.832356	34.71	14.12
R1857	43	1	1	170.6	54	18.5539	67	85	0.788235	10.29	13.85
R1859	26	2	2	165	58	21.3039	75	85	0.882353	11.11	12.44
R1861	42	2	2	173.4	85	28.2697	90.3	100.2	0.901198	12.11	16.37
R1862	32	1	1	160.6	48.5	18.804	69.6	86.7	0.802768	9.2	13.3
R1863	29	1	1	154.8	46	19.1962	62.5	80	0.78125	9.71	10.86
R1864	42	1	1	170.5	77.5	26.6596	88.6	96.8	0.915289	13.51	13.84
R1865	37	1	1	162.6	62	23.4504	73	87	0.83908	17.02	15.71
R1867	26	1	2	162.2	65	24.7065	79	91.3	0.865279	9.93	15.72
R1869	36	1	2	169.8	67	23.238	81.5	92.6	0.88013	13.34	13.86
R187	34	1	1	158.3	59	23.5445	77.2	87	0.887356	13.24	15.04
R1870	37	1	2	169	80.5	28.1853	95	98.5	0.964467	17.48	13.9
R1871	35	1	2	163.6	55.5	20.7361	72	86.4	0.833333	13.07	12.17
R189	24	1	1	164	52	19.3337	67.5	83.5	0.808383	14.41	11.75
R19	24	1	1	168	51	18.0697	63	85.2	0.739437	10.61	13.82
R1905	26	1	1	164	60	22.3081	73.1	90	0.812222	13.24	14.25
R1910	35	1	1	169.4	64.5	22.4767	80.9	94.5	0.856085	11.81	9.81
R1911	39	1	1	165.6	71.5	26.0727	90.5	98.1	0.922528	10.92	10.26
R1914	29	1	1	175	66	21.551	80.3	88.1	0.911464	16.2	11.4
R1917	36	1	1	162	60	22.8624	77.5	92.5	0.837838	19.07	12.38
R1919	26	1	1	170.6	64.5	22.1616	81.3	96.4	0.843361	14.6	11.39
R1922	30	1	1	160.5	51	19.7979	70.8	86	0.823256	16.89	16.09
R1925	21	1	2	174.5	55.5	18.2265	85.2	84	1.01429	11.87	13.65
R1926	33	1	1	164.3	70	25.9312	95	95	1	12.8	10.6
R1929	47	1	1	175.7	73.5	23.8091	85.6	94.3	0.907741	10.27	11.65
R1935	24	1	2	160	59.5	23.2422	75.5	87.6	0.861872	12.41	10.14
R1936	34	1	1	162.7	77.5	29.277	93.5	93.5	1	10.17	14.52
R1937	43	1	1	165	77.5	28.4665	90.8	96.8	0.938017	15.51	15.07
R1939	47	2	2	158.2	67.5	26.9706	88.2	93.2	0.946352	18.27	12.32
R1940	32	2	2	165.5	74	27.0169	85.5	94	0.909574	13.24	12.64
R1961	32	1	1	174.6	56	18.3696	68.6	82.7	0.829504	11.5	10.73
R1962	35	1	1	168.2	73	25.803	84	93	0.903226	14.26	14.74
R1967	28	1	1	171	80	27.3588	92	99.5	0.924623	19.95	11.47
R1970	29	1	1	167.5	62	22.0985	79	90	0.877778	23.22	15.21
R1972	34	1	1	171	61.5	21.0321	75.5	86.2	0.87587	14.33	11.23
R1976	28	1	1	161.5	51	19.5535	66.5	82.3	0.808019	15.11	11.99
R1978	36	1	1	162.3	51.5	19.5511	71	82	0.865854	17.65	14.66
R1979	29	1	1	174.6	74.5	24.4381	87	94	0.925532	13.56	13.68
R1982	25	1	2	171.5	84.5	28.7295	92	99.5	0.924623	13.77	13.1
R1985	30	1	1	174	58	19.1571	70.5	84.5	0.83432	13.96	11.18
R1987	23	1	1	169	55	19.257	70.5	81	0.87037	18.15	13.98
R1991	23	1	1	174.5	58.5	19.2117	68.7	85.2	0.806338	11.25	12.99
R1992	21	1	2	174	63	20.8086	77.5	87.5	0.885714	11.62	12.11
R1993	40	1	1	163	47	17.6898	92.8	93.1	0.996778	12.98	12.66
R1994	36	2	1	170.4	85	29.2738	94.9	100.8	0.941468	10.27	11.44
R1995	35	1	1	169.2	65	22.7045	77.5	89	0.870787	8.89	11.73
R1996	45	2	1	161.7	59.5	22.7561	78.3	89.8	0.871938	19.16	12.25
R1998	31	1	2	174.2	67	22.079	79.1	93	0.850538	12.93	10.98
R201	21	1	1	162.5	50	18.9349	63.5	83.6	0.759569	9.37	10.48
R226	24	2	2	165.2	51.5	18.8707	70	83.5	0.838323	18.67	14.16
R281	27	1	1	171.6	60.5	20.5457	78	86	0.906977	14.49	11.46
R285	29	1	1	161.6	55	21.061	69.3	84.7	0.818182	17.12	10.88
R286	22	1	1	163.7	58	21.6437	73.7	90.8	0.811674	12.09	15.68
R29	29	1	1	166.5	57	20.5611	77	88	0.875	15.07	13.66
R30	34	2	2	178.7	79	24.7388	89.8	97.2	0.923868	12.16	13.61
R317	36	2	2	160	61	23.8281	79	91.8	0.860566	8.48	13.67
R322	35	1	2	160.5	67	26.0091	88.2	92	0.958696	14.58	15.37
R59	25	1	1	172.5	59.5	19.9958	72.1	87.8	0.821185	8.42	14.16
R599	41	1	2	163	64	24.0882	76	94	0.808511	11.01	15.52
R63	23	1	1	180.5	54	16.5745	63	85	0.741176	15.22	14.85
R64	25	1	2	157.2	49	19.8286	69.2	80	0.865	17.29	13.62
R66	33	2	1	171.3	67	22.8328	79	94	0.840426	11.82	13.43
R81	37	1	1	173.1	66	22.0267	82	90	0.911111	14.09	14.26
Z134	27	2	2	164	47	17.4747	63.4	82	0.773171	11.19	15.18
Z142	34	1	1	176	75	24.2123	85.5	96.5	0.88601	16.47	15.12
Z188	31	1	1	170.5	57.7	19.8485	72	86.1	0.836237	9.47	9.68
Z241	37	1	1	177	76.5	24.4183	89.2	102	0.87451	14.16	14.06
Z245	26	1	2	171.5	60.5	20.5697	72.1	91.1	0.791438	10.27	11.79
Z287	25	1	2	177	62.5	19.9496	68.5	87	0.787356	16.03	15.77
Z303	27	2	2	163	56.5	21.2654	71	83	0.855422	13.91	8.92
Z434	30	1	1	168.2	52.5	18.557	70	80	0.875	18.44	11.29
Z437	28	1	1	163	67	25.2174	81.3	89.2	0.911435	11.23	9.15
Z476	48	1	1	169.8	71.5	24.7988	86.8	93	0.933333	13.94	14
Z487	25	1	2	160	67	26.1719	82.5	94.5	0.873016	15.01	15.26
Z490	42	1	1	166.1	56.5	20.479	73.9	87.5	0.844571	12.83	15.21
Z491	31	1	1	167.5	66	23.5242	88.3	92.8	0.951509	14.73	14.57
Z493	36	1	2	161.3	58	22.2925	79.5	90	0.883333	19.15	12.57
Z494	43	1	2	172.1	75.5	25.4909	85.2	94	0.906383	16.64	13.56
Z495	39	1	1	167	68	24.3824	74.5	92.5	0.805405	27.42	13.3
Z496	37	2	1	159	62	24.5243	82	94	0.87234	12.9	12.26
Z497	30	1	1	162	68.5	26.1012	81.5	92.5	0.881081	16.39	13.91
Z498	30	1	1	167	70	25.0995	81.8	93.2	0.877682	11.53	14.62
Z499	34	1	2	170.5	78.5	27.0036	90.8	96.5	0.940933	16.61	11.99
Z53	22	1	2	168.1	58	20.5254	76	88	0.863636	15.29	13.03
R1311	31	2	1	163	73	27.4756	86.7	95.5	0.907853	11.89	13.04
R1320	26	1	1	163.6	52.5	19.6152	69.5	84	0.827381	9.53	10.23
R101	40	1	2	168.8	66.5	23.3387	86	90.4	0.951327	13.85	12.79
R103	32	1	1	170.2	65.5	22.6111	77.4	92.2	0.839479	26.08	12.39
R138	62	2	1	161.5	61	23.3876	83.8	93.5	0.896257	24.45	14.99
H173	39	1	1	181.6	78	23.6517	89.8	99	0.907071	20.25	13.94
H922	33	1	1	164.3	74.5	27.5982	87.3	97.5	0.895385	15.94	10.51
H861	38	2	2	170	67	23.1834	83	91.9	0.903156	16.14	10.56
H920	43	1	1	167.5	65.5	23.346	87.3	92.4	0.944805	40.35	13.75
H924	56	1	2	159.5	66	25.9431	87	97.6	0.891393	17.42	14.75
H823	38	1	2	167.5	79	28.1577	91	102	0.892157	12.97	15.03
H1339	30	1	1	168.5	56	19.7237	67.9	85	0.798824	17.65	11.54
H479	41	1	1	172	62	20.9573	79.5	89.3	0.890258	16.47	13.69
H496	45	1	1	162.1	52	19.7896	72	87	0.827586	17.67	11.57
H497	35	1	2	162.1	52.5	19.9799	67	84.2	0.795724	15.79	12.96
R54	39	1	1	166.3	51.5	18.6218	72.2	83.8	0.861575	13.56	13.08
R55	26	2	2	170.5	65.5	22.5316	83.9	91.9	0.912949	15.14	12.89
H270	47	1	2	171.2	93	31.7304	95.3	109	0.874312	15.32	13.75
R196	46	1	2	170.5	72.5	24.9396	89.5	99	0.90404	9.36	12.21
H603	52	1	2	171.8	77.5	26.2576	92.3	97	0.951546	18.01	12.94
R212	51	2	1	165.7	78.5	28.5907	99.5	102	0.97549	17.05	11.15
H283	35	1	1	171.5	65.5	22.2696	85.5	92	0.929348	15.91	11.72
H342	30	1	1	168	48	17.0068	66.3	82	0.808537	9.9	11.55
H339	35	1	2	163.8	60	22.3627	77.8	90.8	0.856828	16.35	14.14
H132	34	1	2	163	56	21.0772	69.7	86.2	0.808585	12.23	16.08
H393	28	1	1	158	65.5	26.2378	86.7	94	0.92234	15.26	7.36
H220	31	1	2	164	69	25.6544	85.6	94	0.910638	13.12	15.75
R474	33	1	1	172.6	67.5	22.658	80	93	0.860215	14.96	8.42
H1284	26	1	2	170.6	65	22.3334	75.7	91	0.831868	13.38	11.9
H1976	27	1	1	175.5	63	20.4544	78.6	89	0.883146	12.08	11.21
H2020	26	1	2	172.5	60	20.1638	77.8	89.5	0.869274	10.29	13.84
H1982	27	1	2	175.5	68.5	22.2401	78	90.1	0.865705	18.17	14
H1983	25	1	2	171.9	59.5	20.1356	75.2	86.2	0.87239	12.29	9.26
H1984	36	1	2	157.5	58	23.3812	76	88.4	0.859729	11.16	12.69
H195	27	1	2	164.5	53	19.5859	65.2	86.9	0.750288	14.44	13.38
H226	33	1	2	163.2	69.5	26.0942	87.7	95.6	0.917364	14.17	11.9
H1378	45	2	2	164.6	70.5	26.0213	82.8	93	0.890323	16.61	13.84
H1379	44	1	1	165.6	65.5	23.8847	87.2	93	0.937634	13.1	14.96
H191	42	1	2	168.5	68	23.9502	83.2	94.9	0.876712	19.89	12.32
H208	30	1	1	169.5	65.5	22.7983	73.1	92.5	0.79027	16.35	13.25
H211	56	1	1	163.8	60	22.3627	77.6	92	0.843478	16.64	11.13
H144	34	1	2	159.6	55	21.5922	72	88.5	0.813559	16.08	14
H145	35	2	2	168.6	72	25.329	85.3	95.3	0.895068	16.06	13.28
H148	46	2	2	172.3	66.5	22.4002	83.5	90	0.927778	14.57	12.9
H261	40	1	2	172.4	79.5	26.7481	88.4	82.4	1.07282	17.33	9.27
H164	41	1	2	170.5	68	23.3916	86.7	94.4	0.918432	13.55	15.62
H253	53	1	1	170	68	23.5294	86.4	90.5	0.954696	13.88	13.11
H166	42	2	2	165.5	70.5	25.7391	86	97.8	0.879346	13.1	9.13
H213	40	2	2	167.5	53	18.8906	64.9	84.8	0.76533	15.35	13.32
H626	29	1	2	174	63	20.8086	73	92	0.793478	18.16	12.17
H388	53	1	2	172.7	65	21.7936	82.6	88.5	0.933333	15.09	9.12
H401	49	2	2	159.2	47.5	18.7416	70	81.5	0.858896	15.94	10.52
H437	34	1	1	171.5	60	20.3997	73.5	90.5	0.812155	14.1	15.75
H625	41	1	1	164.5	61.5	22.7271	82	90	0.911111	37.6	12.29
H659	38	1	1	164	55	20.4491	67.3	85.7	0.785298	16.21	11.36
R712	29	1	2	173.6	70	23.2273	79.5	93.6	0.849359	12.69	15.29
R714	28	1	1	173.7	62	20.5491	72.8	88.5	0.822599	9.07	13.55
H1428	26	1	2	165.1	54	19.8107	73.2	90	0.813333	17.5	13.57
H1434	23	1	2	167.8	62	22.0195	71	88.5	0.80226	14.75	13.18
H1435	21	1	1	171.7	58	19.6738	71	89	0.797753	15.39	12.46
H1438	25	1	1	171.7	74	25.101	87	101	0.861386	14.4	13.96
H1440	30	1	1	170.5	63	21.6716	80	89	0.898876	14.82	14.36
H1445	33	1	1	166.3	48.5	17.5371	66	83	0.795181	20.46	13.69
H1447	35	2	1	158.1	58	23.2041	75.4	89.5	0.842458	10.45	14.78
H1452	26	2	2	162.7	49	18.5106	67.2	79.8	0.842105	13.34	12.96
H1453	35	1	1	165.7	62	22.5812	85.1	90.7	0.938258	11.42	13.51
R661	29	1	2	165.5	79	28.8424	91.4	100.5	0.909453	10.18	12.9
R663	51	1	2	156.6	65	26.5051	90.5	95.5	0.947644	16.56	11.4
R671	22	1	2	164.2	49.5	18.3594	70.6	82	0.860976	17.5	12.02
R674	23	1	2	177.5	55.5	17.6156	66.3	87.5	0.757714	14.55	14.82
R680	41	1	1	171.7	74.5	25.2706	87.2	95.5	0.913089	13.3	14.01
R685	28	1	2	170	63.5	21.9723	76.4	88	0.868182	11.65	10.91
R688	25	1	2	162.2	58.5	22.2359	73	88	0.829545	12.26	10.09
R692	28	1	1	167.8	59	20.9541	68	87	0.781609	11.91	15.16
R693	34	2	1	164.5	52.5	19.4012	71	82.7	0.858525	15.59	13.67
H1493	34	1	2	176	80	25.8264	88.1	100.6	0.875746	12.26	12.34
H1494	34	1	2	172	74.5	25.1825	92	92.5	0.994595	12.19	14.68
H1496	31	1	1	172.2	58	19.5597	71.4	86.7	0.823529	12.21	14.89
H915	35	1	1	160	59	23.0469	80.5	89.5	0.899441	16.66	12.05
H905	44	1	1	166	59	21.4109	79.5	92	0.86413	16.74	11.83
H1306	52	2	1	171.7	64	21.709	80.2	92.3	0.868906	13.48	13.2
H1470	53	2	2	164.2	54.5	20.2139	74.5	86.2	0.864269	13.91	14.03
H1472	61	1	2	171.5	65.5	22.2696	88.1	93	0.947312	11.98	16.33
R572	43	1	1	168.5	77	27.1201	95	99	0.959596	13.15	11.22
H1390	21	1	1	170	51	17.6471	63.5	84	0.755952	13.56	13.36
H1410	32	1	1	169.5	69	24.0165	76.1	90.8	0.838106	11.22	12.87
H1333	43	2	1	170.5	63	21.6716	76.5	88	0.869318	14.8	12.61
H1341	33	1	1	162	86	32.7694	79.5	87.3	0.910653	13.34	12.36
H1342	27	2	1	168.5	65	22.8936	70.3	86.2	0.815545	12.63	14.61
H1343	25	2	2	168.7	52	18.2715	71	89	0.797753	16.59	15.67
H1344	26	1	2	159.3	56	22.0677	72.5	85.5	0.847953	26.34	15.07
H1345	30	1	2	165.6	66	24.0671	77.2	92.8	0.831897	13.83	12.52
H1347	32	1	2	175.6	71	23.0255	81	94.5	0.857143	13.38	14.3
H1356	36	1	1	165	74	27.1809	95	94.5	1.00529	22.71	15.02
H1358	24	2	2	168	63	22.3214	73.3	89	0.823596	14.83	12.86
H1359	33	1	2	160	52	20.3125	71.4	82.3	0.867558	8.88	12.58
H1365	36	1	1	167.6	60	21.3601	74.8	82	0.912195	15.87	11.28
H1372	37	1	1	168.1	59.5	21.0563	74	89	0.831461	8.98	12.77
H1375	40	1	2	169.2	75.5	26.3722	92.3	97	0.951546	16.25	16.36
H1376	29	1	1	156	49	20.1348	65.6	80.5	0.814907	17.65	14.3
H1386	22	1	2	170.3	68	23.4466	80	97	0.824742	12.85	14.26
H1387	26	1	1	173.1	67	22.3605	83.3	94	0.88617	11.68	15.06
H1391	32	1	2	178.6	87	27.2745	92.4	103.7	0.891032	16.43	13.88
H1392	26	1	1	171.6	75	25.4699	83	95	0.873684	17.88	14.18
H1393	39	1	2	168.5	71.5	25.1829	82	95	0.863158	18.29	13.76
H1395	35	1	2	174.5	78	25.6156	86.4	98	0.881633	14.65	15.93
H1396	41	1	1	170.8	58	19.8816	81.6	88.1	0.92622	15.82	14.29
H1398	31	1	1	163.5	56	20.9485	72	85.5	0.842105	13.33	14.06
H1399	25	1	1	170.8	58	19.8816	74	91	0.813187	16.51	16.36
H1401	36	1	1	164.6	49	18.0857	67.2	82.2	0.817518	18.85	13.87
H1402	27	1	1	175.6	75	24.3227	84	99	0.848485	14.83	10.77
H1406	34	1	1	161.5	59	22.6207	79.2	89.5	0.884916	9.41	12.7
H1407	22	1	2	167	61.5	22.0517	75.6	88	0.859091	16.41	15.86
H1411	32	1	1	174.5	96.5	31.691	99.6	108.5	0.917972	16.66	15.66
H1412	31	2	1	164.5	64	23.6509	78.5	88	0.892045	18.37	12.18
H1413	37	1	2	174.2	76	25.0448	86	92.5	0.92973	43.31	15.81
R556	27	1	1	162.5	55	20.8284	75	85	0.882353	15.64	12.05
R558	33	2	1	163.5	56	20.9485	73.5	86	0.854651	15.01	10.91
R562	23	1	2	177.7	66.5	21.0594	70	92	0.76087	11.52	14.01
R581	27	1	1	179	84	26.2164	88.3	102.1	0.864838	13.35	10.79
R606	46	1	1	158.8	52.5	20.8189	75	87.1	0.861079	14.73	12.44
R609	30	1	2	163.8	57	21.2445	70.2	86.5	0.811561	22.31	14.72
R611	27	1	2	167	59	21.1553	78	91.8	0.849673	13.28	13.28
R616	23	1	2	156.5	49	20.0063	70	82	0.853659	10.58	15.01
R617	34	1	1	174.7	88.5	28.9973	100.2	103	0.972816	17.91	11.91
R618	31	1	1	158.1	67.5	27.0047	89.2	96	0.929167	15.29	11.13
R651	24	1	1	176.5	99.5	31.9399	98.6	108.7	0.907084	12.24	13.81
H1332	32	1	1	169.1	73.5	25.704	86	96.5	0.891192	16.43	16.52
H1348	28	2	2	162.7	61	23.0438	72.4	82.5	0.877576	14.8	16.45
H1360	27	2	1	172.5	98	32.9343	99.8	108.8	0.917279	14.37	14.26
H1361	32	1	1	171.1	78	26.6437	86.5	99	0.873737	14.19	11.65
H1362	32	1	1	162.5	88.5	33.5148	102	106	0.962264	11.63	9.55
H1371	28	1	1	164.5	59	21.8032	76.5	86	0.889535	12.92	14.58
R570	23	1	2	168.6	57	20.0521	71.5	88	0.8125	14.47	13.44
R638	25	1	2	162	56.5	21.5287	74	88	0.840909	13.69	14.36
H505	20	2	2	171	51	17.4413	67	86.5	0.774566	15.38	10.66
H528	29	1	1	159	44	17.4044	66.7	81.8	0.815403	14.03	13.64
H529	44	1	2	173.3	72.5	24.1402	89.8	96	0.935417	22.9	12.6
H452	28	1	1	170.4	64	22.0415	75.3	93	0.809677	12.59	10.07
H1457	27	1	1	170.7	65.5	22.4789	84.8	92	0.921739	15.68	11.21
H1459	35	1	1	169.8	69	23.9317	80.5	93.6	0.860043	13.21	15.44
H1460	35	1	1	162.8	65.5	24.7134	85.2	91.5	0.931148	11	13.52
H1476	37	1	1	170.5	59	20.2957	81.5	83.4	0.977218	12.13	12.01
H1473	32	1	2	176	67.5	21.7911	79.6	90.3	0.881506	17.17	15.26
H1475	32	1	1	164.5	49	18.1077	70.6	80	0.8825	10.1	14.02
H1477	47	1	1	172	82	27.7177	99	98	1.0102	12.41	9.49
H1479	32	1	1	157.6	43	17.3124	63	78.7	0.800508	19.41	12.27
H1480	35	1	1	163.5	71	26.5597	90.2	98.5	0.915736	11.68	10.58
H1481	25	1	1	177.5	59.5	18.8851	70	90	0.777778	13.48	11.42
H1482	30	1	1	169.5	61	21.232	79.8	91.7	0.870229	12.34	15.33
H2210	47	1	1	171	66.5	22.742	86	93	0.924731	13.28	9.42
H2212	45	1	2	164	52	19.3337	69	88.5	0.779661	14.73	13.25
H2234	26	1	2	169.5	59	20.5358	71	86	0.825581	16.47	9.56
H2293	37	1	1	180	78	24.0741	85	98.5	0.862944	16.47	8.96
H2302	53	1	1	174	82	27.0842	96	97.5	0.984615	13.59	11.88
H2305	45	1	1	164.5	56.5	20.8793	72.5	88.6	0.818284	14.09	10.92
H2310	44	1	1	173.6	86	28.5364	94	96.5	0.974093	7.98	9.31
H2226	48	1	1	163	70	26.3465	87	93	0.935484	8.85	15.09
H2228	39	2	1	171	69.5	23.768	85	96	0.885417	10.25	16.24
H2214	41	1	1	172.3	62	20.8844	74.6	87	0.857471	13.09	10.47
H2233	40	1	1	176.5	91.5	29.3719	96.5	107	0.901869	18.88	11.03
H2239	47	1	2	169.5	71	24.7126	89	95	0.936842	10.51	15.38
H2242	41	1	1	161.5	72	27.605	88.5	96	0.921875	11.4	12.71
H2243	59	1	1	171.5	69.5	23.6296	88.5	90	0.983333	19.41	11.44
H2301	41	1	2	168	67.5	23.9158	91.2	96	0.95	7.29	10.59
H2303	51	1	1	161	53	20.4467	73.5	88.5	0.830508	8.45	12.03
H2175	40	1	2	164.7	58.5	21.566	77	86	0.895349	10.9	8.36
H2181	53	1	1	166	73.5	26.673	87	94.5	0.920635	11.79	9.69
H2182	45	2	1	179.5	84.5	26.2257	94	98	0.959184	12.61	11.41
H2187	50	1	1	170.8	72	24.6807	85	94	0.904255	13.28	11.55
H2191	43	1	1	164.5	63	23.2814	80	89	0.898876	11.74	14.43
H2193	38	1	1	185	82	23.9591	91	99	0.919192	18.42	12.5
H2195	34	1	1	170.5	72	24.7676	84	96	0.875	15.21	14.47
H2201	44	2	1	172.5	59	19.8278	70	87	0.804598	16.03	10.01
H2205	44	2	1	170	65	22.4913	77	90.5	0.850829	16.37	13.35
H2207	48	1	1	170.5	75.5	25.9716	89.5	94.5	0.94709	16.88	13.99
H2218	25	1	2	166	53.5	19.415	67.5	81	0.833333	16.03	15.17
H2225	33	1	2	160	51	19.9219	73	84	0.869048	9.93	12.6
H2229	39	1	1	161.5	50	19.1701	71	83	0.855422	12.15	13.29
H2231	47	1	1	172	60.5	20.4502	76	91.5	0.830601	28.77	9.12
H2232	40	1	1	171	82.5	28.2138	95	101	0.940594	9.43	12.72
R1765	57	2	2	166	84.5	30.6648	100	104	0.961538	11.52	13.05
R1766	46	1	1	172	63	21.2953	76.5	87.5	0.874286	12.83	12.12
R1771	26	1	2	160.5	52.5	20.3802	67.5	84.2	0.801663	18.52	14.02
R1889	47	1	1	166	81.5	29.5761	98	97	1.01031	14.42	11.79
R1943	40	1	1	173	71.5	23.8899	84	94	0.893617	16.76	10.86
R1955	46	1	2	173	73	24.3911	89	97.5	0.912821	14.03	13.77
R1434	26	1	2	169.8	87.5	30.3482	92.2	101.9	0.904809	12.42	12.17
R470	37	1	2	165.1	75.5	27.6983	86	95.1	0.904311	11.07	10.2
H844	40	2	1	164.1	67	24.8804	87.2	91	0.958242	15.16	10.06
H846	30	1	1	168.8	70	24.5671	82	92.2	0.889371	17.16	14
H1246	34	1	1	175.6	77.5	25.1335	93.1	98.5	0.945178	15.47	10.42
H1300	27	1	1	170	61	21.1073	77.9	91.6	0.850437	15.44	14.75
H1302	28	1	2	172.5	72.5	24.3646	85	95.3	0.89192	12.03	14.12
H1245	45	1	1	166.3	63.5	22.9609	88	91	0.967033	21.5	10.21
H1019	48	1	2	170	81.5	28.2007	99	98	1.0102	15.52	15.95
H982	48	1	1	172.7	65.5	21.9612	83	90	0.922222	18.59	14.91
H1021	39	1	1	173	82	27.3982	93.5	102.5	0.912195	18.97	15.26
H1051	43	1	1	172.8	83.5	27.964	96	100.5	0.955224	13.49	14.3
H1092	26	1	1	167.6	64	22.7841	79	90.3	0.874862	12.54	10.59
H1093	41	1	1	165	76.5	28.0992	97	100.7	0.963257	17.91	11.4
R339	40	1	2	158.7	60	23.8231	86.8	91.7	0.946565	9.82	9.74
H1354	25	1	2	168.2	47.5	16.7896	63.2	82	0.770732	12.57	12.89
H1355	33	1	1	164.8	67	24.6695	88	94	0.93617	17.88	7.51
H1036	34	1	1	172	70	23.6614	75	92	0.815217	16.12	12.08
H347	39	1	1	165	66.5	24.4261	84.6	95.7	0.884013	17.07	15.57
H1009	44	1	2	175	87	28.4082	98.7	99.3	0.993958	13.39	12.97
H1025	51	1	1	164	81	30.116	94.1	99.3	0.947633	14.66	7.99
H1047	36	1	1	170.7	73.5	25.2244	80.5	95.2	0.845588	15.69	10.27
H654	29	1	1	165	52	19.1001	68.5	83.5	0.820359	9.33	9.92
H711	24	1	2	178.3	109	34.2866	110.1	116	0.949138	14.09	14.97
H598	25	1	1	163.2	72.5	27.2206	88	99	0.888889	11.41	11.98
H1004	25	1	2	169	61.5	21.5329	71	91	0.78022	14.48	9.83
H1028	39	1	1	167	66.5	23.8445	87.4	89.5	0.976536	10.5	12.43
H942	54	1	1	171.5	72.5	24.6496	90	94.5	0.952381	33.27	7.75
H946	67	1	2	167.3	74.5	26.6173	90	96.5	0.932642	10.75	11.61
H967	43	1	1	165	95	34.8944	104.3	108.2	0.963956	15.6	12.06
H957	62	1	2	172.1	80	27.0102	91	98	0.928571	18.15	7.96
H1030	37	1	1	178	66.5	20.9885	79.3	90.5	0.876243	10.78	14.1
H1061	38	1	1	162.7	71.5	27.0104	92.9	96.7	0.960703	17.72	12.82
H971	41	1	1	167	80	28.6851	87.5	93.6	0.934829	14.59	11.83
H975	47	1	2	166.7	68	24.4702	84.3	93.5	0.901604	11.39	13.9
H984	38	1	1	166	58	21.048	73.5	86.3	0.85168	14	13.34
H1033	39	2	1	168.3	56.5	19.9471	71.2	84.3	0.844603	12.35	15.61
H1038	46	1	2	173.1	86	28.7015	107	100.5	1.06468	12.01	10.6
H1043	31	1	2	170.7	77	26.4255	86.5	98	0.882653	15.37	9.08
H929	44	1	1	173.5	73	24.2507	89	93.5	0.951872	17.33	13.28
H930	40	1	1	169.7	86	29.8631	95.5	104.5	0.913876	13.52	12.1
H935	63	1	1	166.3	69	24.9497	87.8	90	0.975556	21	8.59
H936	43	2	1	161.4	74.5	28.5989	95	97	0.979381	17.78	13.82
H958	52	1	1	173.7	78	25.852	86	96	0.895833	15.16	12.28
H960	43	1	1	167.7	64.5	22.9347	83.8	92.5	0.905946	24.44	10.34
H965	56	1	2	174	78.5	25.9281	87.5	100	0.875	19.13	10.63
H955	44	1	1	169	89	31.1614	94.7	105.5	0.89763	22.49	7.47
H938	60	1	2	164	71.5	26.5839	83.6	94.7	0.882788	15.67	10.93
H1029	32	1	1	172	73	24.6755	82.9	93.5	0.886631	15.81	13.29
H1045	25	1	1	168.3	62	21.8889	80.5	91	0.884615	12.69	12.04
H1039	33	1	1	170	68	23.5294	87.5	91	0.961538	10.84	9.39
H1000	37	1	2	170.2	85	29.3427	93	100	0.93	14.06	14.78
H1046	25	1	2	185.7	82	23.7788	89	99	0.89899	12.09	15.01
H1050	48	1	1	167.1	65	23.2788	82.5	92	0.896739	11.57	11.45
H997	45	1	2	165.3	67.5	24.7035	88.6	93	0.952688	12.48	11.02
H999	47	1	2	170.7	73.5	25.2244	87	97	0.896907	16.92	13.4
H1005	39	1	1	169	80	28.0102	88.5	97	0.912371	15.34	11.02
H1015	39	1	1	170.2	67	23.1289	72.6	92	0.78913	19.45	9.69
H988	39	1	2	174	73.5	24.2767	86	93.6	0.918803	15.3	12.03
H995	47	1	2	175.5	71.5	23.2141	85.4	94.5	0.903704	11.41	14.62
H992	47	1	1	161.8	59.5	22.7279	79.6	88	0.904545	15.7	8.27
H994	36	1	1	164.4	76.5	28.3047	85	102	0.833333	15.08	11.8
H991	35	1	1	165.5	67	24.4613	84.7	90.5	0.935912	17.29	10.81
R84	42	1	2	171.1	74	25.2774	94.2	101.5	0.928079	15.37	14.31
R156	41	1	1	175	80	26.1224	93.7	99.6	0.940763	10.8	9.43
H117	38	1	1	164.9	69.5	25.559	84.2	94	0.895745	13.12	11.31
H552	46	1	1	163.5	57.5	21.5096	80.5	89.3	0.901456	15.15	10.84
H605	50	1	1	155.5	54	22.3323	75.4	86.5	0.871676	16.56	14.02
H606	35	1	2	171.7	71.5	24.253	80	95.5	0.837696	13.52	10.82
H351	27	1	2	174.4	65	21.3708	77.5	94.5	0.820106	16.18	12.92
H584	52	2	2	165.2	68	24.9166	86.5	94	0.920213	15.06	14.64
H913	40	1	2	176.5	78	25.0383	85.7	96	0.892708	16.85	10.93
R182	29	1	2	178.5	69	21.6557	86.6	95	0.911579	11.22	11.35
H276	24	1	2	168.5	65	22.8936	81.5	96.2	0.847193	17.48	12.25
H330	25	1	2	164.3	69	25.5608	85	99.8	0.851703	13.45	13.51
H374	33	1	2	166.3	72	26.0344	85.7	96.5	0.888083	14.39	9.5
H375	26	1	2	171	56.5	19.3222	76	89	0.853933	12.71	14.65
H376	25	1	1	174	85	28.075	87.2	103	0.846602	17.48	12.63
H377	25	1	1	164	61	22.68	83.7	94.5	0.885714	13.77	9.12
H379	65	1	2	173.1	68	22.6942	89.8	97.5	0.921026	22.86	14.37
H380	28	1	1	167.5	86	30.6527	100.8	99.8	1.01002	7.55	10.5
H385	25	1	2	180.3	85	26.1473	99	102.3	0.967742	18.42	10.74
H404	31	2	1	173.7	75	24.8577	88	98	0.897959	18.37	8.12
H405	25	1	2	167.2	61	21.8201	73.5	90.8	0.809471	27.2	13.94
H406	23	1	2	165.4	59	21.5666	73.5	94	0.781915	16.3	14.6
H408	26	1	2	164.3	56	20.745	81.2	91.5	0.887432	40.05	13.2
H413	21	1	1	167.6	60.5	21.5381	72	90	0.8	14.91	10.88
H414	27	1	1	175	78.5	25.6327	85.5	97	0.881443	14.62	11.2
H417	24	1	2	170.3	58	19.9986	67	87	0.770115	16.99	14.25
H418	26	1	1	171	75.5	25.8199	87.5	100	0.875	16.43	11.47
H423	25	1	2	169.1	76	26.5782	89	100	0.89	14.25	12.24
H425	23	1	1	164.7	53	19.5384	66.2	84.5	0.783432	9.02	9.32
H426	25	1	2	176	67	21.6296	80	94	0.851064	29.54	15.09
H428	23	1	1	172	61.5	20.7883	69	87.5	0.788571	13.09	12.41
H429	23	1	2	176.7	63	20.1775	68.5	89	0.769663	14.08	12.88
H430	24	1	1	165.5	80	29.2075	89.5	103.7	0.863067	20.59	12.1
H431	25	1	1	168.7	80.5	28.2856	92.5	100.7	0.91857	15.5	10.22
H471	27	1	2	160.2	50	19.4825	67.5	85	0.794118	15.41	11.61
H919	51	1	2	160.4	74.5	28.9566	96	101	0.950495	18.67	10.05
H916	31	1	1	167.8	54.5	19.3559	68.2	86.5	0.788439	12.49	10.4
H1466	30	1	2	177.5	103	32.6919	106.7	108.5	0.98341	12.82	13.8
R163	32	1	1	168.7	77	27.0558	93	99	0.939394	13.31	10
H872	36	1	1	169.5	66	22.9723	81.6	90.5	0.901657	40.35	8.12
R129	52	1	2	164.3	62.5	23.1529	84.3	95.6	0.881799	15.47	13.19
R70	34	1	2	173	71.5	23.8899	85.5	97	0.881443	20.53	14.82
R76	29	1	2	176.1	69.5	22.4113	81.8	95.8	0.853862	17.6	16.29
R77	27	1	2	175.5	74	24.0258	82.5	96.5	0.854922	11.51	12.96
R93	38	1	1	167	59	21.1553	80	90.3	0.885936	11.14	9.24
R96	38	1	1	166	63.5	23.044	82.2	94	0.874468	11.73	11.11
H446	26	1	2	173.1	63	21.0255	71.3	88.2	0.80839	15.43	15.87
R134	27	1	2	185	82	23.9591	87.7	102	0.859804	14.88	13.11
R145	45	1	1	167.8	70	24.8607	83	94.3	0.88017	17.31	14.54
R147	30	1	2	173.4	70	23.2809	80.2	95.6	0.838912	18.06	12.46
R90	51	1	2	168.1	53	18.756	85.5	91	0.93956	15.57	15.37
H725	40	1	1	176.5	78	25.0383	95	94.5	1.00529	17.5	11.29
H628	46	2	2	176.3	74	23.8082	86.7	97	0.893814	13.15	15.03
H633	24	1	2	170.5	69	23.7356	78.5	95.5	0.82199	17.35	11.02
H637	43	1	2	168.3	69	24.3602	84	93	0.903226	15.13	13.68
H643	39	1	2	165.7	73.5	26.7696	92	97	0.948454	12.32	12.13
H647	44	2	1	173	83	27.7323	101.5	104	0.975962	11.8	11.83
H650	33	1	1	171.6	64.5	21.9041	76.2	92	0.828261	54.26	14.23
H699	32	2	2	171.5	82	27.8795	93.5	100	0.935	14.79	13.06
H707	44	1	1	172.9	77	25.7573	86.6	92.5	0.936216	14.98	8.6
H665	44	1	1	169	69	24.1588	82.6	90	0.917778	19.42	12.25
H690	40	1	2	169.5	65.5	22.7983	80.2	90	0.891111	14.79	8.3
H697	36	1	2	164	64	23.7954	80	94	0.851064	14.81	13.79
H705	38	1	2	177.6	79.5	25.2047	88	100.5	0.875622	17.08	12.31
H720	57	1	1	178.3	89.5	28.1527	104.5	103	1.01456	20.34	11.58
H723	35	1	2	178	73	23.04	85.3	94.5	0.902646	22.98	11.8
H889	34	2	1	176.5	73	23.4333	82	95	0.863158	15.78	11.21
H851	45	1	2	168.5	61.5	21.6608	75.7	89	0.850562	16.35	11.9
H876	46	1	2	156	62	25.4767	83.8	87	0.963218	21.34	11.83
H886	41	1	1	163.5	57	21.3226	81	86	0.94186	8.24	11
H897	40	1	2	180.6	82.5	25.2941	92.8	97	0.956701	15.91	14.66
H894	32	1	1	167.4	58.5	20.8759	79	88.5	0.892655	14.43	10.47
H820	45	1	2	173	77	25.7276	92.7	92	1.00761	15	10.69
H821	32	1	2	176.3	86	27.669	96.7	101	0.957426	13.26	12.07
H822	26	1	2	171.8	75	25.4106	86.3	98.3	0.877925	16.07	10.8
H828	37	1	1	170.5	66.5	22.8756	63.2	87	0.726437	13.88	12.83
H829	45	1	1	171.5	66	22.4396	82.5	89	0.926966	14.87	9.85
H831	29	1	2	172.1	74	24.9845	88	96	0.916667	18.09	11.14
H834	46	1	1	174.3	80	26.3327	97.6	97.3	1.00308	12.37	10.67
H847	52	1	2	161.5	71	27.2216	91.3	97.5	0.93641	14.71	10.38
H869	25	1	2	172	68.5	23.1544	81.5	92.7	0.87918	16.74	10.27
H880	40	1	1	175.2	56	18.244	72.8	85.3	0.853458	16.38	11.38
R294	38	1	1	170.8	56.5	19.3675	68.5	83.5	0.820359	14.16	12.9
H910	39	1	2	170.5	77	26.4876	90.3	96.3	0.937695	17.42	13.61
H923	33	1	1	169.4	95	33.1052	105	106	0.990566	33.17	11.8
H681	31	1	1	164	69	25.6544	91.5	94.5	0.968254	16.12	10.74
H201	37	1	2	169.1	67.5	23.6057	81	91	0.89011	19.26	15.69
H244	60	2	2	162.1	65	24.737	84.3	89	0.947191	14.4	13.4
H246	67	2	2	167	65	23.3067	87	91.5	0.95082	15.26	15.71
H278	38	1	1	165.1	63.5	23.2959	84.3	90	0.936667	14.32	9.69
H1294	43	2	2	172.5	87.5	29.4056	100.7	104.5	0.963636	13.02	15.58
H1293	44	1	2	170.6	84.5	29.0335	101.5	100	1.015	13.23	11.34
H1295	32	1	1	163.1	56	21.0514	73	83.5	0.874251	22.03	9.39
H1297	31	2	1	167.5	76.5	27.2667	93.5	95.6	0.978033	16.53	11.76
H715	32	1	1	165.2	68	24.9166	84.5	96	0.880208	16.27	14.64
H1053	49	2	2	175	92	30.0408	100.2	102	0.982353	12.71	12.06
H1052	35	1	1	172	75	25.3515	87	97	0.896907	14.79	9.97
H1012	34	1	1	167	76	27.2509	81	96.3	0.841121	12.09	12.89
R444	36	1	1	163	58.5	22.0181	75.5	89.2	0.846413	12.93	8.05
H1077	29	1	2	170	66	22.8374	72.5	96.5	0.751295	11.29	10.52
H969	30	1	2	170	62.5	21.6263	74.5	74.3	1.00269	11.46	13.05
H970	32	1	1	170	74.5	25.7785	78.5	96	0.817708	13.67	12.11
H1003	38	1	1	177.4	77	24.4672	85.6	98	0.873469	14.56	11.27
H1084	32	1	2	176.5	79	25.3593	86	97.5	0.882051	18.36	14.8
H1073	44	1	1	167	72.5	25.9959	92	97	0.948454	14.79	11.88
H1074	36	1	1	166.6	86.5	31.1649	101	107	0.943925	15.83	15.5
H977	40	1	1	165.1	59.5	21.8284	79	88	0.897727	12.61	10.61
H981	25	1	2	174.2	78.5	25.8686	87.3	100.2	0.871257	10.61	13.11
H1068	35	1	1	179	69.5	21.691	79	92	0.858696	12.27	12.56
H974	33	1	2	174.8	83	27.1641	94.8	102	0.929412	14.35	13.56
H1027	43	1	1	169.7	61	21.182	76	90.8	0.837004	12.87	9.61
H1057	45	1	2	167	69	24.7409	87.6	89.5	0.978771	12.24	14.9
H1069	31	1	2	174.7	79.5	26.0484	91	100	0.91	13.39	10.72
H1089	64	2	2	161	51	19.6752	66.1	82.3	0.803159	14.38	12.52
H1072	47	1	2	170	69	23.8754	88.5	94	0.941489	11.14	15.87
H1113	59	1	1	162	55	20.9572	76	87	0.873563	11.97	12.61
H1153	56	2	2	170.1	66.5	22.9833	80.5	91	0.884615	16.2	12.37
H1320	56	1	1	169	59	20.6575	71	87.2	0.81422	43.05	9.75
H1574	51	1	1	164.7	61.5	22.6719	79.2	89.5	0.884916	16.69	12.83
H1597	42	1	1	172.5	71	23.8605	80	90	0.888889	14.87	10.7
H1598	37	1	1	170.6	57	19.5847	67.3	85.8	0.784382	15.57	13.6
H1599	55	1	1	165.3	52.5	19.2138	71	85.1	0.834313	13.31	11.02
H1600	41	1	1	170.2	65	22.4385	76.3	90	0.847778	17.7	14.54
H1601	47	1	1	169.3	66	23.0266	77	89	0.865169	12.37	11.06
H1604	54	1	2	168.1	79	27.9571	90.4	96.7	0.93485	15.73	14.04
H1605	47	1	2	164	58.5	21.7504	73.3	86.2	0.850348	12.79	8.53
H1606	54	1	1	159	51	20.1733	72.1	82.5	0.873939	14.38	13.16
H1607	52	1	2	161.3	67	25.7517	90.2	96	0.939583	14.69	14.64
H1610	39	1	1	169	59.5	20.8326	68.5	87.5	0.782857	10.97	14.03
H3	47	1	1	163.8	63.5	23.6671	86	93	0.924731	16.37	15.42
H300	36	1	2	169.5	57	19.8397	70.2	88.8	0.790541	13.92	14.72
H609	53	1	1	168.5	58	20.4281	74.8	89.2	0.838565	15.13	9.73
H740	49	1	2	165	69	25.3444	90	92.1	0.977199	26.45	10.78
H859	61	1	1	166.2	70	25.3417	84.2	95	0.886316	14.33	11.72
H939	41	2	2	161	63	24.3046	80	91	0.879121	10.97	13.88
R1223	46	1	1	171	58	19.8352	73.5	82	0.896341	11.23	13.36
R1230	63	2	1	164	68	25.2826	84.5	93	0.908602	18.66	14.38
R125	59	1	1	178.2	92	28.9716	107.7	104.6	1.02964	14.13	14.02
R127	56	2	2	169.5	57	19.8397	73.5	87.3	0.841924	13.05	14
R1274	64	1	1	156.5	56	22.8644	67	86.2	0.777262	15.59	12.32
R1292	35	1	1	165.2	61	22.3517	70	87.6	0.799087	10	12.52
R1371	45	2	2	167.5	65	23.1677	83	95	0.873684	12.61	15.99
R1438	52	1	2	166	64.5	23.4069	85	92.5	0.918919	12.36	14.25
R1449	41	1	1	159.7	64.5	25.2901	77	93.2	0.82618	11.77	10.18
R1458	42	1	2	167	72	25.8166	87.3	98.1	0.889908	9.78	10.9
R1459	49	1	1	170	56.5	19.5502	73.6	86.2	0.853828	10.32	10.29
R1460	39	1	1	153.4	50	21.2481	66.5	79.2	0.839646	7.81	10.82
R1462	49	1	1	175.6	60	19.4582	73	83	0.879518	13.17	13.84
R1503	58	1	2	164.1	56.5	20.9812	67.8	87.8	0.77221	9.51	16.14
R152	48	1	1	176	62	20.0155	72.8	90.8	0.801762	13.3	14.05
R1702	37	2	1	163	56	21.0772	71	86.2	0.823666	13.89	12.86
R1723	37	1	1	170.8	71	24.3379	79.2	89.8	0.88196	17.46	16.27
R1736	65	1	1	159.7	55	21.5652	77	85	0.905882	18.47	12.55
R1747	37	1	1	156.5	45.5	18.5773	67	78.5	0.853503	10.56	12.16
R1749	47	1	1	165.6	59	21.5145	74	88.4	0.837104	12.51	14.56
R1768	55	1	2	161	61	23.533	82	88.5	0.926554	9.87	11.03
R1770	43	1	1	155	49.5	20.6035	71.3	83.3	0.855942	7.56	12.02
R1881	52	1	2	172	60	20.2812	73.8	86	0.85814	13.27	16.06
R1882	56	1	2	167	64.5	23.1274	85.8	92.8	0.924569	19.92	11.65
R1885	57	1	1	166.6	63	22.6982	72.3	88.7	0.815107	13.85	15.01
R1886	56	1	1	162.1	56	21.3119	72.2	84	0.859524	18.25	14.82
R1892	52	1	2	165.8	79	28.7381	93.5	100	0.935	12.34	15
R1895	65	1	1	166.6	60	21.6173	81	88	0.920455	25.2	11.14
R1942	47	1	1	161.5	60	23.0042	73.6	87	0.845977	6.46	12.62
R1945	30	1	1	173.8	62	20.5254	73.5	89.7	0.819398	17.38	12.32
R1953	63	1	1	165.5	75	27.382	92.6	92	1.00652	18.33	14.05
R1960	37	1	1	164.1	57.6	21.3897	71.5	85	0.841176	16.38	13.08
R248	56	2	1	159	56.5	22.3488	79	89.3	0.884658	13.87	12.06
R304	38	1	1	172	79	26.7036	87.2	93	0.937634	17.22	9.78
R74	57	1	1	161.9	49	18.694	71.3	82	0.869512	13.96	10.14
R797	44	1	1	168	75	26.5731	92.5	96	0.963542	15.01	14.49
R88	40	1	2	163.6	63	23.5382	85	89.8	0.946548	13.79	13.89
R960	58	2	2	160.8	70	27.0723	94.7	95	0.996842	13.1	15.88
R965	59	1	1	167	60	21.5139	71.1	87.2	0.815367	17.19	12.64
R968	53	1	2	159.1	53	20.938	67	81.3	0.824108	16.95	12.78
R975	57	1	1	167	63	22.5896	80.2	88.6	0.905192	15.21	10.2
R979	42	1	2	167	66.5	23.8445	82	88	0.931818	11.81	12.69
R983	56	1	1	166.2	61	22.0835	77.8	88.6	0.878104	10.25	8.35
R984	65	1	2	157.3	60	24.249	93.5	90.5	1.03315	16.28	13.31
R985	55	1	2	163	55.5	20.889	68.5	81	0.845679	17.22	10.73
R988	56	1	1	152	58.5	25.3203	71.2	81	0.879012	18.52	12.04
R996	44	1	1	155.2	48.5	20.1353	73	82	0.890244	12.59	13.71
Z121	45	1	1	173.8	61	20.1944	76	91.1	0.834248	9.6	12.38
Z180	45	1	1	175.4	59.5	19.3401	76.6	88	0.870455	16.1	10.42
Z256	62	1	1	166.1	51	18.4855	72.5	83	0.873494	17.21	9.13
Z257	40	1	2	179.7	91	28.1803	96.6	104	0.928846	12.36	14.77
Z347	68	2	1	161.2	53	20.396	74.5	82	0.908537	15.29	12.98
Z370	45	1	1	168.3	51.5	18.1819	69.5	84.5	0.822485	10.61	10.12
Z471	40	1	2	167	58.5	20.976	67.6	85.3	0.792497	30.65	14.82
R1233	67	1	1	173	69	23.0546	77	86	0.895349	13.89	11.55
R1277	47	1	1	158.5	49.5	19.7036	66.5	80.2	0.829177	12.32	13.64
R1288	60	1	1	167.6	58.5	20.8261	77	87.1	0.884041	16.75	14.56
R1372	46	2	1	165.7	78	28.4086	99	90	1.1	11.04	12.25
R1493	38	1	1	170	71.5	24.7405	83.6	94	0.889362	14.13	14.87
R1706	40	1	1	163	51.5	19.3835	68.5	84.7	0.808737	9.31	14.66
R1711	45	1	2	166.5	74.5	26.8737	87.6	97	0.903093	10.05	12.35
R1714	41	1	2	155.6	50	20.6515	67.3	83	0.810843	9.09	12.95
R1715	49	1	2	162.6	54.5	20.6137	74	84.8	0.872642	10.24	11.62
R1737	67	2	2	162.5	57	21.5858	73.2	82.9	0.882992	20.12	16.47
R1744	44	2	2	172.6	69.5	23.3294	82	89	0.921348	9.55	11.56
R1748	37	1	1	169	63	22.0581	78.8	89.2	0.883408	16.84	10.29
R1754	63	1	1	174.2	67	22.079	80.5	86	0.936047	13.91	14.45
R1772	51	2	1	168.6	70	24.6254	83.2	90.3	0.921373	14.65	15.09
R610	56	1	1	166.3	59.5	21.5146	73.8	91	0.810989	18.37	13.33
R972	66	1	2	161.5	65	24.9212	93.1	87.4	1.06522	16.81	15.05
Z429	48	1	1	158.1	62	24.8044	79.5	92	0.86413	12.69	10.46
Z433	51	1	1	165.1	59	21.645	79	84.4	0.936019	12.88	11.16
Z438	39	1	1	162.7	65.5	24.7438	85	91	0.934066	13.68	12.32
Z444	41	1	2	169.6	64	22.2499	78	89.8	0.868597	13.03	13.47
Z450	63	1	2	171.6	78	26.4887	92.7	96	0.965625	13.27	11.84
Z452	47	2	1	153.1	51.5	21.9714	75.5	87.5	0.862857	10.73	12.66
Z455	48	1	1	167.6	60	21.3601	72	85	0.847059	13.12	13.61
Z467	36	1	1	161.2	54	20.7809	69	85	0.811765	11.28	15.05
H746	40	1	2	170.5	63.5	21.8436	77	93.5	0.823529	15.36	12.44
H745	38	1	2	164.5	69	25.4987	79	92.3	0.855905	14.9	12.44
H750	61	2	1	155	46.8	19.4797	74	82	0.902439	14.38	13.13
H771	48	1	1	171	60	20.5191	79	90	0.877778	16.64	12.35
H781	32	2	2	172.7	72.5	24.3082	80.3	97	0.827835	23.32	10.93
H787	46	1	1	166.5	63.5	22.9058	84	94.5	0.888889	19.21	12.39
H789	38	1	2	156.9	61	24.779	78.2	86	0.909302	14.47	16.52
H760	41	1	2	168.7	65.5	23.015	77.5	92	0.842391	19.75	12.3
H925	39	1	2	165.7	66.5	24.2201	84.5	91	0.928571	12.37	11.59
H2144	40	1	1	171.6	87	29.545	95	103	0.92233	15.76	10.05
H2164	39	1	1	179.5	72.5	22.5014	88.5	94.2	0.93949	14.68	7.4
H2165	49	1	2	170.5	71.5	24.5956	84	90.5	0.928177	11.23	13.04
H2174	52	1	1	172	84.5	28.5627	96	102	0.941176	13.99	14.85
R41	32	1	1	172	56	18.9292	65.7	86.9	0.756041	15.19	16.1
H770	53	1	1	171.1	62.5	21.3491	80	91.5	0.874317	16.23	12.14
H809	45	1	1	164.1	83	30.822	101.7	102.5	0.992195	17.6	12.03
H814	61	1	2	162.6	53.5	20.2354	73	84	0.869048	17.55	16.25
H816	52	2	2	166	76.3	27.6891	92	93.5	0.983957	17.89	11.33
Z220	33	1	1	174.2	74	24.3857	89	99.5	0.894472	14.82	10.45
H115	66	1	1	163.6	64.5	24.0987	83.4	95	0.877895	12.71	14.32
H515	48	1	2	159.4	75	29.5178	83.6	94.5	0.884656	15.55	14.33
H525	36	2	1	168.8	92	32.2881	102.5	109.8	0.933515	16.6	15.27
H560	35	1	2	166.5	71.5	25.7916	84.7	95.5	0.886911	14.05	14.78
H570	30	1	2	165	54.5	20.0184	78	84	0.928571	14.84	13.52
H593	30	1	2	173.9	62	20.5018	73.5	93.5	0.786096	14.35	15.45
H565	40	1	2	176.7	78.5	25.1418	88.2	97	0.909278	11.31	9.59
H611	27	2	2	171.2	73.5	25.0772	88.7	98	0.905102	14.04	13.54
H612	25	1	2	172.8	61.5	20.5962	76.5	92	0.831522	12.22	15.52
H613	46	1	2	174.4	56.5	18.5761	70	85.5	0.818713	14.12	14.92
H617	35	1	2	183.5	86	25.5403	91.7	98.2	0.933809	15.78	12.59
H618	38	1	2	165.5	86	31.398	96	102	0.941176	15.44	10.87
H578	47	1	2	168.9	56.5	19.8057	92.6	101	0.916832	17.18	14.97
H580	41	1	2	165.8	87	31.6483	100.5	107.5	0.934884	12.59	14.62
H587	48	1	2	174.2	74	24.3857	88	97.2	0.90535	15.45	12.01
H589	62	1	1	169.6	60.5	21.0331	85.5	89.2	0.95852	12.69	10.83
H590	45	1	1	166.6	64	23.0584	73.5	93.5	0.786096	14.42	13.33
H591	48	1	2	164.8	59	21.7239	72.8	88	0.827273	17.18	13.87
H592	40	1	1	170.5	71.5	24.5956	88.6	92.5	0.957838	11.49	13.92
H594	45	1	1	166	68	24.677	84.5	92.5	0.913514	18.74	11.76
H595	28	1	2	167.1	58.5	20.9509	81.3	95	0.855789	15.31	11.58
H597	31	1	2	164	71	26.398	83.8	97	0.863918	11.58	12.12
H604	45	1	2	163.2	68	25.531	88	93	0.946237	17.13	13.93
H623	24	1	2	172.1	79	26.6726	88.2	100	0.882	24.76	12.74
H624	31	1	2	173.8	68.5	22.6773	80.5	97	0.829897	11.83	13.57
H645	41	1	2	166.7	82.5	29.6881	104.2	102.5	1.01659	12.05	15.04
H555	29	1	2	165.5	50.5	18.4372	68	83.7	0.812425	15.72	11.65
H557	38	1	1	164.7	56	20.6443	73	89	0.820225	19.82	13.55
H488	22	1	1	176	79	25.5036	84.6	98.2	0.861507	15.94	9.51
H513	27	1	1	173.5	54.5	18.105	70.7	86	0.822093	14.98	15.41
H514	42	1	2	173.2	70	23.3347	92.5	94.2	0.981953	16.21	14.09
H516	31	1	2	170.3	69	23.7914	86	95.5	0.900524	13	14.23
H518	40	2	2	163.9	74	27.547	92	98.4	0.934959	15.91	12.73
R218	38	1	1	166.5	58	20.9218	79.6	89.3	0.891377	23.19	13.18
R223	35	1	1	165.7	63	22.9454	80	91	0.879121	12.53	9.38
H1334	42	1	2	172.6	77	25.8469	92	96.3	0.955348	14.42	13.54
H651	26	1	2	175.5	57.5	18.6687	72	88.8	0.810811	18.31	14.72
H652	25	1	2	168.3	66.5	23.4776	80.4	94.5	0.850794	15.86	14.77
H1158	31	1	2	160.2	60.5	23.5738	81.4	90.3	0.90144	15.2	12.15
H1115	33	1	1	166	65.5	23.7698	83.7	92.5	0.904865	13.12	9.46
H1162	27	1	1	164.3	65.5	24.2642	80.7	91.8	0.879085	10.41	10.66
H1280	31	2	2	174	61	20.148	71.5	88	0.8125	14.6	14.73
H1281	38	1	1	169.2	61	21.3073	78	87.2	0.894495	15.41	15.32
R358	45	1	2	168	71.5	25.333	83.7	96.8	0.864669	16.59	11.73
R364	38	1	1	168.1	70	24.7721	90.2	95	0.949474	16.82	11.08
R443	43	1	1	160	63	24.6094	75.5	88.5	0.853107	9.87	8.62
H72	26	1	1	163	56.5	21.2654	73	88.5	0.824859	14.4	10.27
H153	48	1	2	167.5	65.5	23.346	83.7	96	0.871875	13.96	11.54
H223	25	1	1	169	69	24.1588	84	100	0.84	19.29	11.99
H392	28	1	2	165.5	65	23.7311	81	93.2	0.869099	14.35	13.18
H396	55	1	2	173	79	26.3958	92.8	100.7	0.921549	15.6	14.05
H758	30	1	2	169.3	58.5	20.41	72.7	89	0.816854	11.53	11.9
H766	30	1	1	170.2	74.5	25.718	84.8	97	0.874227	54.72	13.59
R33	36	1	1	160	69	26.9531	88	97.8	0.899796	15.59	10.71
H489	42	2	2	165	61.5	22.5895	78.6	88	0.893182	59.93	13.02
H491	50	1	1	164	65.5	24.3531	87	91.5	0.95082	14.95	11.2
H495	37	1	1	170	82	28.3737	90.1	96.2	0.93659	13.77	9.6
H462	47	1	1	162.2	64.5	24.5165	78.2	92.5	0.845405	12.95	11.24
H478	40	1	1	171.5	68.5	23.2896	80	93.5	0.855615	16.42	10.06
H482	39	1	2	162	62.5	23.815	83	90	0.922222	13.62	10.08
R199	67	2	2	165.4	55	20.1044	73.5	86.5	0.849711	17.94	15.51
R209	41	1	1	165.5	55	20.0801	76.5	87	0.87931	12.35	9.68
H457	38	1	2	175.2	74	24.1081	80.5	95	0.847368	13.82	10.48
H490	34	1	2	168.3	60	21.1828	74	90.8	0.814978	13.69	14.5
H510	30	1	2	166	58.5	21.2295	74.5	90.5	0.823204	24.1	12.48
H512	28	1	2	165.4	59	21.5666	76	87.8	0.865604	16.16	15.19
H524	35	1	1	172.8	72	24.1127	85	97	0.876289	14.52	15.3
H534	40	2	2	181.3	87.5	26.6203	90.6	105	0.862857	14.06	12.26
H535	28	1	2	170.9	69	23.6246	84	94.5	0.888889	25.27	15.61
H536	43	1	2	168.7	79	27.7586	93.1	100.5	0.926368	12.92	11.72
R228	37	1	1	167.8	77	27.3468	93	96	0.96875	15.74	11.97
H543	49	2	2	168.3	80	28.2437	98.6	102.8	0.959144	11.74	16.27
H378	25	1	2	163	63	23.7118	78.3	91	0.86044	25.37	13.79
H383	25	1	2	175.5	64.5	20.9414	76.9	91.8	0.837691	15.02	16.11
H387	40	1	1	172.6	79.5	26.6861	95.7	101	0.947525	16.35	10.47
H398	25	1	2	163	65	24.4646	80.8	83.5	0.967665	37.04	13.53
H1247	29	1	1	172.3	77	25.937	86	97.5	0.882051	20	13.64
H719	40	1	1	170.3	54.5	18.7917	70	85	0.823529	22.81	13.75
H1269	60	1	2	162.6	69	26.098	88.5	94.5	0.936508	16.43	12.87
H1278	22	1	2	166	76	27.5802	88.3	97.5	0.905641	13.91	14.39
H1101	37	1	1	163.7	52.5	19.5912	68	83.3	0.816327	15.23	11.87
H1102	65	1	1	157.5	56.5	22.7765	77.5	88	0.880682	17.62	8.74
H1103	68	1	2	160.1	55	21.4575	77.5	85	0.911765	20.39	9.64
H1107	66	1	1	170.3	60	20.6882	77.3	89	0.868539	15.28	9.26
H1109	66	1	2	170	68.5	23.7024	82.6	91.7	0.900763	21.73	10.03
H1114	69	2	1	163.5	68.5	25.6245	85.3	96	0.888542	17.79	12.04
H1116	66	1	1	159.6	75	29.4439	99	101.7	0.973451	19.21	10.75
H1121	45	1	1	171.5	72.5	24.6496	88	92.6	0.950324	16.13	13.92
H1132	30	1	1	166.7	67.5	24.2903	90.5	97	0.93299	16.57	11.7
H1134	38	1	1	169	56.5	19.7822	72	87	0.827586	17.99	13.32
H1136	28	1	1	162.2	45	17.1045	61.5	80	0.76875	17.5	12.34
H1138	30	1	1	163.1	60.5	22.743	78	88.5	0.881356	49.41	13.56
H1140	27	1	1	171.8	75	25.4106	86.5	101	0.856436	16.91	7.53
H1146	33	1	1	168	86	30.4705	92.8	98	0.946939	21.54	9.03
H1151	66	1	2	166.5	63.5	22.9058	82	92	0.891304	15.99	10.24
H1156	60	1	2	157	59	23.9361	82.3	89.3	0.921613	16.77	12.11
H1161	69	1	2	156.1	61	25.0336	84	90	0.933333	18.31	10.32
H1178	37	1	1	174	61	20.148	92.7	96.8	0.957645	18.5	10.82
H1180	34	1	1	165.7	70	25.4949	88	92	0.956522	13.61	7.71
H1253	39	1	1	159.5	50	19.6539	70.5	80.6	0.87469	15.08	9.49
H1259	57	1	1	170.3	82	28.2738	90.3	99.2	0.910282	13.76	16.17
R359	37	1	2	174	57	18.8268	77	83.6	0.921053	17.4	9.92
H1150	36	1	1	175.2	80	26.0628	89.6	99.6	0.899598	11.58	9.68
H1255	22	1	1	174.5	88.5	29.0638	95.5	104.5	0.913876	13.61	10.24
H1256	37	2	1	180	57	17.5926	67.5	87	0.775862	16.89	8.71
H1258	37	1	1	163.2	58	21.7765	77	86.2	0.893271	14.32	12.99
R535	51	2	1	168	64	22.6757	89.2	90	0.991111	13.41	13.45
R346	63	1	2	166	54	19.5965	75.8	85.5	0.88655	21.68	10.71
R390	61	2	1	159	55.5	21.9532	79.5	87.3	0.910653	13.08	14.77
R397	67	1	2	164	72.5	26.9557	83.7	97.8	0.855828	18.82	16.06
R399	67	1	2	164.2	64.5	23.9229	88.2	94	0.938298	21.02	13.19
R402	67	1	2	159.2	68.5	27.0274	93.1	97	0.959794	17.6	12.44
R406	60	1	1	156.1	54.5	22.3661	76	85.5	0.888889	12.19	14.13
R407	61	1	1	159	50	19.7777	73.2	85	0.861176	18.87	11.53
R420	68	2	1	163	67.5	25.4055	94	91	1.03297	43.26	13.17
R433	53	1	1	177	79	25.2163	99	93	1.06452	23.02	14.16
R478	46	1	2	161.2	62.5	24.0519	86.3	92.5	0.932973	17.04	14.94
R480	43	1	1	160	54	21.0937	74.8	80.7	0.92689	19.08	13.64
R481	43	1	1	170.6	82	28.1745	95.5	97	0.984536	19.48	10.61
R482	35	2	2	159.5	52	20.4401	77	83.7	0.919952	20.73	10.59
R491	47	1	1	172.3	64	21.558	80	88.5	0.903955	7.33	11.22
R497	44	1	2	175.2	94	30.6238	100.2	100	1.002	10.1	15.03
R498	29	1	1	157	68	27.5873	83.7	94	0.890426	13.48	12.16
R499	53	1	1	162.5	65	24.6154	88	92.4	0.952381	11.75	13.85
R501	39	1	2	166.3	77	27.8424	92.7	97.2	0.953704	15.57	11.77
R503	55	2	1	164.4	67	24.7897	90.5	91.8	0.985839	20.96	14.63
R507	45	1	1	167.6	75	26.7001	88	98.9	0.889788	13	14.49
R509	38	1	1	167.1	73	26.1439	95	96	0.989583	10.86	12.53
R510	34	1	1	169.4	92	32.0598	102.2	107	0.95514	13.79	13.95
R512	38	1	2	175.1	54	17.6125	70	86	0.813953	18.9	10.96
R514	36	1	2	169.5	61	21.232	74.3	89	0.834831	12.46	14.75
R516	44	2	2	167.1	60.5	21.6672	78.5	90	0.872222	11.45	12.58
R519	47	1	1	169.6	69	23.9882	88	96	0.916667	12.19	13.66
R524	45	1	1	170.3	65.5	22.5846	86	91	0.945055	11.42	8.09
R530	41	1	2	166	65.5	23.7698	83.3	93	0.895699	14.55	12.36
R633	30	1	2	166.8	59.5	21.3858	79.2	91	0.87033	10.81	15.56
R658	48	1	1	164.5	60	22.1727	83	89	0.932584	17.55	12.73
R659	41	1	2	172.7	63.5	21.2907	78	91	0.857143	12.69	12.14
R523	54	1	1	163	82	30.863	103.5	100	1.035	10.96	15.8
R543	48	1	2	171.5	82	27.8795	93.1	101	0.921782	16.79	13.6
R585	43	1	1	160.3	68.5	26.6578	89	93	0.956989	16.28	11.49
R590	26	1	1	174.5	61	20.0327	70.5	89	0.792135	13.43	15.6
R624	43	1	1	167.5	68	24.237	82	96.3	0.851506	15.19	13.22
R428	58	2	2	156.5	62.5	25.5183	85	92	0.923913	14.3	16.07
R351	57	1	1	165.5	76	27.7471	99.2	93	1.06667	18.63	10.19
R431	69	1	2	161.1	76	29.2835	96.5	99	0.974747	24.39	13.11
R414	66	1	2	166.4	75	27.0866	92	97.5	0.94359	17.04	12.33
R457	29	1	2	164.3	56	20.745	74.3	84.6	0.878251	16.25	12.45
R538	44	1	2	159.5	54	21.2262	70	83.5	0.838323	15.67	15.52
R445	45	1	1	168.5	76.5	26.944	93.3	98	0.952041	12.11	12.94
R550	52	1	1	162	72	27.4348	90.5	96	0.942708	19.36	10.03
R458	46	1	1	169.5	81	28.1933	98.5	98.5	1	17.28	11.07
R466	29	1	1	171.7	70.5	23.9138	89.2	97.8	0.912065	10.36	8.09
H1566	60	1	1	172.7	70.5	23.6377	89.5	95	0.942105	23.08	13.6
H1580	62	1	1	179.5	79	24.5187	98.5	96.5	1.02073	15.25	13.53
H1585	35	1	1	166.6	78	28.1025	93.8	103	0.91068	13.64	15.4
H1595	38	1	1	180.5	74.5	22.8666	85.5	97	0.881443	15.73	16.53
H1612	25	1	2	179.5	70	21.7255	79.2	95.1	0.832808	15.79	13.11
H1629	32	1	1	171	65.5	22.4001	80.1	89	0.9	13.15	10.33
H1639	28	1	1	174	78	25.763	88.5	94.6	0.935518	12.17	13.41
R998	28	1	1	169	65	22.7583	82.5	93	0.887097	18.99	12.85
H1630	35	2	1	172.5	65	21.8442	80.6	90.8	0.887665	15.64	9.87
H1636	53	2	2	166	80	29.0318	93.9	97.6	0.96209	12.71	15.88
R1002	24	1	2	169.5	70	24.3646	80	95.5	0.837696	15.64	12.79
H1614	54	1	1	170.6	65	22.3334	75	88.5	0.847458	13.83	12.83
H1558	32	1	1	168	75	26.5731	86.3	95.2	0.906513	12.19	9.58
H1575	51	2	1	169	70.5	24.684	87.5	90.6	0.965784	15.62	12.42
H1584	35	1	1	171	78	26.6749	89	97.1	0.916581	18.87	8.6
H1587	30	1	1	167.7	74	26.3127	89.1	97	0.918557	16.65	13.5
H1591	30	1	1	179.7	70.5	21.832	89.2	97.8	0.912065	11.93	13.67
H1592	27	1	1	168.2	87	30.7516	97	103.6	0.936293	10.32	11.13
H1620	59	1	1	167	71.5	25.6373	86.5	95	0.910526	14.69	15.14
H1624	30	1	2	173.6	89	29.5318	95.2	97.7	0.974411	10.65	8.95
H1626	30	2	1	174.8	85	27.8187	91	103	0.883495	12.78	13.55
H1634	38	1	1	162.5	77	29.1598	91.6	98	0.934694	21.19	11.31
H1638	37	1	1	170.5	75	25.7996	86	95.9	0.896767	10.43	15.56
H1640	24	1	2	163.2	78	29.2856	88.5	94.5	0.936508	19.8	12.46
H1642	45	1	1	168.5	71	25.0068	84.5	94	0.898936	13.2	15.46
R994	34	1	1	165.2	60	21.9852	75.3	91.8	0.820261	10.61	13.67
Z409	40	1	1	165.5	76.5	27.9296	92.8	100	0.928	15.69	9.41
H845	21	1	1	164	52.5	19.5196	71.6	85.5	0.837427	17.6	11.6
H848	37	2	1	166.2	51.5	18.6443	80	91.3	0.876232	25.37	8.41
H332	25	1	1	167.5	68	24.237	79.8	95.1	0.839117	13.55	12.38
R335	33	1	1	170.8	65.5	22.4525	81.2	93	0.873118	10.75	9.79
H181	38	1	2	176	74.5	24.0509	79.5	101	0.787129	14.13	10.57
H182	39	1	2	164.6	72.5	26.7595	86.5	96.5	0.896373	18.09	10.49
H196	45	1	1	167.1	57	20.4137	73.6	86.5	0.850867	18.48	9.61
H250	62	1	2	167.5	68	24.237	87.5	91.2	0.95943	15.06	14.94
H280	37	1	2	168	67.5	23.9158	80	93.5	0.855615	14.14	11.7
Z63	51	1	2	162	78	29.7211	92	97	0.948454	16.21	12.48
H683	26	1	2	156.5	47.5	19.3939	69	81.5	0.846626	21.71	11.74
H1409	25	2	1	169	57	19.9573	70	86	0.813953	15.29	15.21
H170	39	1	1	177.5	78	24.757	87.2	96	0.908333	19.8	10.78
H192	46	1	1	174.3	73.5	24.1932	91.2	97.2	0.938272	17.53	12.06
H2217	37	1	2	170	59	20.4152	71	85.5	0.830409	8.85	16.02
H257	50	1	1	172.3	71	23.916	91.6	93.5	0.979679	21.05	10.69
R133	28	1	2	176.7	74.7	23.9248	85.2	97.3	0.875642	13.81	13.23
R45	47	1	1	158.2	67	26.7708	82.5	95	0.868421	13.86	11.95
R545	29	1	1	176	68.5	22.1139	80.7	90.5	0.891713	17.75	13.87
